# Supplementary material for: Comment on “A simple constrained machine learning model for predicting high-pressure-hydrogen-compressor materials” by Hattrick-Simpers, et al., Molecular Systems Design & Engineering, 2018, 3, 509
Source: Royal Society of Chemistry journal article supplement (doi:10.1039/c9me00138g), 2020-01-01
Supplement: c9me00138g2.zip [file c9me00138g2.zip]

## Sheet: Sheet1
Material Class	Composition Formula	Hydrogen Weight Percent	Heat of Formation (kJ/mol H2)	Temperature (˚C)	Pressure (Atmospheres Absolute)	Author Year	Reference Number	Comment1	Comment2	Comment3
A2B	Mg2Ni1-yBey	3.9	71 - 80	337	2017-03-05	Lupu, 1982	419	(y = 0.15-0.25)
A2B	Mg2Ni1-yCuy	2.6	53 - 73	300	3.5 - 8	Darnaudery, 1983	417	(y = 0-1)
A2B	Pr2Al	1.4				Semenenko, 1985	1151		(Amorp)
A2B	Th1.5Ce.5Al	0.4	133	650	0.0003	Van Vucht, 1963	492
A2B	Th2Al	0.8	130	500	0.001	Van Vucht, 1963	492
A2B	Th2Al	0.8				Sorby, 2000	1235
A2B	Th2Al	3.9		50	2017-10-09	Buschow, 1982	283
A2B	Ti2Al	1.2				Semenenko, 1982	532
A2B	Ti2Co	0.2				Beck, 1962	45
A2B	Ti2Co	2.1				Verbetsky, 1986	1153
A2B	Ti2Co (M)	1.7				Mintz, 1980	3
A2B	Ti2CoOx	1.7				Mintz, 1980	3	(x = 0.18-0.33)
A2B	Ti2Cr	0.9				Beck, 1962	45	(O-stabilized)
A2B	Ti2Cu	1		500	0.02	Arita, 1979	495
A2B	Ti2Cu	1.7				Maeland, 1978	389
A2B	Ti2Cu	1.8				Padurets, 1982	498
A2B	Ti2Cu	2.2				Beck, 1962	45
A2B	Ti2Cu (M)	2.2	130	500	0.12	Kadel, 1978	523
A2B	Ti2Fe	0.4				Beck, 1962	45	(O-stabilized)
A2B	Ti2FeO.3	0.5				Mintz, 1980	3
A2B	Ti2FeO.5	0.7				Stioui, 1981	493
A2B	Ti2Mn	0.9				Beck, 1962	45	(O-stabilized)
A2B	Ti2Ni	1.9				Beck, 1962	45
A2B	Ti2Ni	2				Padurets, 1982	498		(Dp>300 C)
A2B	Ti2Ni	2.2				Yamanaka, 1975	73
A2B	Ti2Ni (M)	1.6		150	0.11	Buchner, 1972	71
A2B	Ti2Ni (M)	1.7				Mintz, 1980	3
A2B	Ti2NiO.3	1.1				Mintz, 1980	3
A2B	Ti2NiOx	1				Mintz, 1979	441
A2B	Ti2Pd	1.4	90			Kadel, 1978	523
A2B	Ti2Pd	1				Maeland, 1980	428
A2B	Ti2Pd.5Cu.5	85				Kadel, 1978	523
A2B	Ti2Pt	0.4				Beck, 1962	45	(O-stabilized)
A2B	Y2Al	1.4				Semenenko, 1985	1151		(Amorp)
A2B	Zr2Co	1.9				van Essen, 1979	386
A2B	Zr2Cr	1.3				Beck, 1962	45	(O-stabilized)
A2B	Zr2Cu	1.7				Maeland, 1980	428
A2B	Zr2Cu (M)	1.3	144	600	0.003	Pebler, 1966	12
A2B	Zr2Cu (M)	1.3	142	700	0.02	Kadel, 1979	429
A2B	Zr2Fe	1.7				van Essen, 1979	386
A2B	Zr2Fe	2.1				Yartys, 1998	1225		(Dp>400°C)
A2B	Zr2Fe(B2O3).1	1.7				Zavaliy, 1998	829
A2B	Zr2FeO.3	1.5				Zavaliy, 1998	829
A2B	Zr2Ni	1.3	183	604	0.003	Pebler, 1966	12
A2B	Zr2Ni	1.3				Trzeciak, 1956	483
A2B	Zr2Ni	1.8				van Essen, 1979	386
A2B	Zr2Ni	2				Akopyan, 1983	496
A2B	Zr2Pd	0.9				Maeland, 1980	428
A2B	Zr2Pd	1.6		25	0.1	Spada, 1987	424
A2B	Zr2Pd (M)	1.9		20	500	Klyamkin, 1994	595		(2000 atm at 20°C)
A2B	Zr2Rh	1.5				Suryanarayana, 1994	596
A2B	ZrTiNi	1.9				Semenenko, 1980	511
A2B	(Hf.2Zr.8)2Fe	1.5				Zavaliy, 1998	829
A2B	(Hf.4Zr.6)2Fe	1.6				Zavaliy, 1998	829
A2B	(Hf.6Zr.4)2Fe	1.4				Zavaliy, 1998	829
A2B	(Hf.8Zr.2)2Fe	1.3				Zavaliy, 1998	829
A2B	Er2Al	1.1				Semenenko, 1985	1151		(Amorp)
A2B	Eu2Ir	1				Moyer, 1980	457
A2B	Hf2Co	0.7				Mukai, 1999	1230
A2B	Hf2Co	0.9		50	2017-10-05	van Essen, 1979	386
A2B	Hf2Co	0.9				Jones, 1980	430
A2B	Hf2Co	1.1				Beck, 1962	45
A2B	Hf2Cu	0.4				Mukai, 1999	1230
A2B	Hf2Cu	0.7				Maeland, 1980	428
A2B	Hf2Cu	0.7		50	2017-10-05	van Essen, 1979	386
A2B	Hf2Cu (M)	1.5		20	1500	Klyamkin, 1994	595		(2000 atm at 20°C)
A2B	Hf2Fe	0.75		50	2017-10-05	van Essen, 1979	386
A2B	Hf2Fe	0.8				Mukai, 1999	1230
A2B	Hf2Fe	1.2				Forker, 1999	1227
A2B	Hf2Fe	1.1	60 - 80	277	0.38	Aubertin, 1989	425
A2B	Hf2Fe	1.2				Zavaliy, 1998	829
A2B	Hf2Fe	1.2		22	1500	Klyamkin, 1997	655		2000 atm at 22°C
A2B	Hf2Mn	0.95		50	2017-10-05	van Essen, 1979	386
A2B	Hf2Mn	1.1				Beck, 1962	45
A2B	Hf2Ni	0.7				Mukai, 1999	1230
A2B	Hf2Ni	0.75		50	2017-10-05	van Essen, 1979	386
A2B	Hf2Ni.5Cu.5	0.7				Klyamkin, 1999	1231		P=10 atm
A2B	Hf2Ni.5Fe.5	1.2				Klyamkin, 1999	1231		P=10 atm
A2B	Hf2Ni.5Mn.5	1.2				Klyamkin, 1999	1231		P=10 atm
A2B	Hf2Ni.5Mn.5	1.2				Klyamkin, 1997	655		2000 atm at -78°C
A2B	Hf2Pd	0.3				Mukai, 1999	1230
A2B	Hf2Pd	0.4				Maeland, 1980	428
A2B	Hf2Pd (M)	1		20	1000	Klyamkin, 1994	595		(2000 atm at 20°C)
A2B	Hf2Pt	0.25				Beck, 1962	45
A2B	Hf2Rh	0.45		50	2017-10-05	van Essen, 1979	386
A2B	Hf2Rh	0.5				Jones, 1980	430
A2B	Ho2Al	1.2				Semenenko, 1985	1151		(Amorp)
A2B	Mg1.5Ni	2.6	29.1	300	3.7	Kuji, 2002	1492		Ball milled
A2B	Mg1.75Ni	2.8	26.6	300	4.5	Kuji, 2002	1492		Ball milled
A2B	Mg1.75Ti.25Ni.75Cu.25	2		300	2.3	Yuan, 1999	1229
A2B	Mg1.92Al.08Ni	3.5	70.5	295	4	Hirata, 1983	427
A2B	Mg1.9Al.1Ni	3.5		250	1	Tsushio, 1998	830
A2B	Mg1.9Al.1Ni.8Co.2			250	0.42	Tsushio, 1998	830
A2B	Mg1.9Al.1Ni.8Cu.2			250	1.7	Tsushio, 1998	830
A2B	Mg1.9Al.1Ni.8Mn.2			250	0.95	Tsushio, 1998	830
A2B	Mg1.9B.1Ni	2.8		250	0.9	Tsushio, 1998	830
A2B	Mg1.9Ca.1Ni.8Cu.2			250	1.4	Tsushio, 1998	830
A2B	Mg1.9Si.1Ni	2.9		250	1	Tsushio, 1998	830
A2B	Mg1.9Ti.1Ni	2.9	62.5	300	2.5	Liang, 1999	1226	Nanocrystalline
A2B	Mg1.9Ti0.1Ni0.9Mn0.1	3.1		250	0.8	Yuan, 2001	1489
A2B	Mg2Co	4.5				Selvam, 1991	426	(Mg2Co phase not stable without H)
A2B	Mg2Co	4.5	76	450	16	Reiser, 2000	1463	Mg2Co not stable without H
A2B	Mg2Co (M)	4.2	108	418	5.7	Yoshida, 1993	594	(Mg2Co phase not stable without H)
A2B	Mg2Cu	2.6	72.9	295	6	Reilly, 1967	87
A2B	Mg2Fe	5.5				Selvam, 1991	426	(Mg2Fe phase not stable without H)
A2B	Mg2Fe	5.5	77.2	450	25	Reiser, 2000	1463	Mg2Fe not stable without H
A2B	Mg2Ni	3.1		300	1	Dehouche, 1998	854	Nanocrystalline
A2B	Mg2Ni	3.1	31.3	300	3.7	Kuji, 2002	1492		Ball milled
A2B	Mg2Ni	3.2	61	250	1.1	Yang, 2002	1493		Ball milling + diffusion synthesis
A2B	Mg2Ni	3.3	67	300	2.2	Liang, 1999	1226	Nanocrystalline
A2B	Mg2Ni	3.3	65.9	300	3.2	Sun, 1999	1228	Solid-state synthesized
A2B	Mg2Ni	3.3	63.2	300	3.1	Song, 1998	1224
A2B	Mg2Ni	3.5	64.4	180	0.09	Guthrie, 1998	863	Vapor synthesized	Non-twinned
A2B	Mg2Ni	3.5	64.4	180	0.07	Guthrie, 1998	863	Vapor synthesized	Twinned
A2B	Mg2Ni	3.5	68.6	180	0.05	Guthrie, 1998	863	Melted	Twinned
A2B	Mg2Ni	3.5		250	1.1	Tsushio, 1998	830
A2B	Mg2Ni	3.6	64.5	299	3.2	Reilly, 1968	88
A2B	Mg2Ni	3.6	64.6	300	2.5	Lutz, 1977	420
A2B	Mg2Ni	3.6	68.8	180	0.06	Guthrie, 1998	863	Melted	Non-twinned
A2B	Mg2Ni	3.6	71.3	300	2.6	Li, 2000	1236	Hydriding combustion synthesis
A2B	Mg2Ni	3.7	62.2	450	57	Reiser, 2000	1463
A2B	Mg2Ni	4.4				Chen, 2002	1491		P=60,000 atm (LiAlH4 H2 source)
A2B	Mg2Ni	5.2				Chen, 2000	1234		P=60,000 atm @ 600C
A2B	Mg2Ni.75Co.25	3.1	64.5	279	1	Darnaudery, 1983	418
A2B	Mg2Ni.75Co25	3.4		300	1	Yang, 2000	1233
A2B	Mg2Ni.75Cr.25	3	59.9	248	1	Darnaudery, 1983	418
A2B	Mg2Ni.75Cu.25		53.2	227	1	Darnaudery, 1983	418
A2B	Mg2Ni.75Fe.25	2.8	63.2	253	1	Darnaudery, 1983	418
A2B	Mg2Ni.75Fe.25 (M)	3.3	65.2	300	1.9	Yuan, 1997	828		Includes free Mg
A2B	Mg2Ni.75V.25	2.9	62.4	250	1	Darnaudery, 1983	418
A2B	Mg2Ni.75Zn.25	3.3	61.5	246	1	Darnaudery, 1983	418
A2B	Mg2Ni0.75Co0.25	3.2	61	250	0.5	Yang, 2002	1493		Ball milling + diffusion synthesis
A2B	Mg2Ni0.75Cr0.25	3.2	61	250	0.9	Yang, 2002	1493		Ball milling + diffusion synthesis
A2B	Mg2Ni0.75Cu0.25	3.2	59	250	1.2	Yang, 2002	1493		Ball milling + diffusion synthesis
A2B	Mg2Ni0.75Fe0.25	3.2	60	250	1	Yang, 2002	1493		Ball milling + diffusion synthesis
A2B	Mg2Ni0.75Mn0.25	3.2	58	250	1	Yang, 2002	1493		Ball milling + diffusion synthesis
A2B	Mg2Ni0.75Ti0.25	3.2	56	250	1.2	Yang, 2002	1493		Ball milling + diffusion synthesis
A2B	Mg2Ni0.75Ti0.25	3.2	59	250	1.3	Yang, 2002	1493		Ball milling + diffusion synthesis
A2B	Mg2Ni0.7Zr0.3	3.5	59.8	340	10	Zhang, 1998	1465
A2B	Mg2Ni1-xZrx	3.2	59.8 - 64	248 - 253	1	Zhang, 1998	1465	x=0 to 0.3
AB	ScAl	1.1				Semenenko, 1985	1151
AB	SmMg					Beck, 1962	45
AB	ThCo	1.2				Beck, 1962	45
AB	ThCo	1.4	46.8	40	0.05	Buschow, 1975	187
AB	ThNi	1.2	45.3	40	0.01	Buschow, 1975	187
AB	Ti.42Zr.08Fe.50	0.7		50	12	Rajalakshmi, 1999	1221
AB	Ti.46Fe.45V.05Mn.05	1.7	28.6	22	2	Mitrokhin, 1993	396
AB	Ti.48Fe.47V.025Mn.025	1.7		22	2	Verbetsky, 1998	1219
AB	Ti.96Zr.04Fe.95Nb.04	1.7	31.8	30	1.4	Sasai, 1983	79
AB	Ti.9Fe.9B.2	1.5	7.6	27	14	Rajalakshmi, 1998	852
AB	Ti.9La.1Co	1.5	60	150	3.2	Kato, 1981	83
AB	Ti.9Zr.1Fe	1	28.9	30	3.3	Jang, 1986	397
AB	Ti1.1Fe	1.6		50	5	Lee, 2000	1223
AB	Ti1.1FeB.001	1.1		50	10	Lee, 2000	1223
AB	Ti1.1FeC.001	1.3		50	6	Lee, 2000	1223			sloping plateau
AB	Ti1.3Fe	1.9		25	2	Ma, 2000	1222			sloping plateau
AB	Ti1.3Fe + 1.5 wt.% Mm	1.6		25	1.5	Ma, 2000	1222			sloping plateau
AB	Ti1.3Fe + 6 wt.% Mm	1.8		25	1.5	Ma, 2000	1222			sloping plateau
AB	Ti1-xCuxFe	0.8		30	0.8 - 3	Nagai, 1986	392	(x = 0.02-0.1; + 0.5%Fe2O3)
AB	Ti1-xNbxFe	1		30	2.5 - 4	Nagai, 1986	392	(x = 0.04-0.12; + 1.0%Fe2O3)
AB	Ti1-xVxFe1-yMny	1.5				Liu, 1982	499	(x=0.01-0.04, y=0-0.2)
AB	Ti1-xZrxFe	1		30	2017-03-07	Jang, 1986	397	(x = 0-0.2)
AB	Ti1-xZrxFe	1.6		40	2.5 - 4.5	Nishimiya, 2000	1217	x=0.1-0.5		no plateau at x=0.5
AB	TiAg					Beck, 1962	45
AB	TiAl	0.7				Semenenko, 1982	532
AB	TiCo	1.1	61.1	150	2.2	Someno, 1979	381
AB	TiCo	1.3	57.8	150	2.2	Osumi, 1980	80
AB	TiCo	1.4	57.4	155	4	Yamanaka, 1975	73
AB	TiCo (M)	0.7		116	5.2	Reilly, 1976	490
AB	TiCo (M)	1.45	54	152	2	Burch, 1979	500
AB	TiCo.5Fe.5	1.1	42.3	100	4	Suzuki, 1981	82
AB	TiCo.5Mn.5	1.6	46.9	120	3.2	Osumi, 1980	80
AB	TiCo.8V.2	1.8				Verbetsky, 1986	1153
AB	TiCo.9V.1	1.5				Verbetsky, 1986	1153
AB	TiCo1-yFey	1.1	42 - 58	150	2.8 - 18	Suzuki, 1981	82	(x = 0-0.5)
AB	TiCo1-yMny	1.3	47 - 58	150	2.2 - 9	Osumi, 1980	80
AB	TiCu	0.4				Beck, 1962	45
AB	TiCu	0.6		500	0.19	Arita, 1979	495
AB	TiCu	1.3		500	0.2	Someno, 1979	381
AB	TiCu	1.7	75	200	0.004	Maeland, 1978	389
AB	TiCu	1.8				Pauurets, 1982	498
AB	TiCu	1.8				Yamanaka, 1975	73
AB	TiCu (M)	1.6	126	500	0.15	Kadel, 1978	523
AB	TiFe (+4.5 w/o Mm)	1.6		27	3	Bronca, 1985	549
AB	TiFe (1 w/o Mm)	1.7		40	7	Sandrock, 1978	321
AB	TiFe (M)	1.7	26.7	51	11	Yamanaka, 1975	73
AB	TiFe (M)	1.9	28.1	30	5.2	Reilly, 1974	319
AB	TiFe.5Co.5	1.1	41.4	150	12	Someno, 1979	381
AB	TiFe.6Ni.4	1.5	48.6	50	0.035	Bershadsky, 1993	395
AB	TiFe.76Al.24	1.1				Sandrock, 1978	321
AB	TiFe.7Mn.2	2	34.7	40	1.4	Reilly, 1976	383
AB	TiFe.7Mn.3	1.6		40	1.3	Sandrock, 1976	76
AB	TiFe.88	2		40	4	Reilly, 1974	319
AB	TiFe.8Be.2	1.4	30.5	21	0.7	Bruzzone, 1980	421
AB	TiFe.8Cr.2 (M)	1.8		40	0.4	Reilly, 1976	490
AB	TiFe.8Ni.15Nb.05	1.1		150	7	Oguro, 1983	78
AB	TiFe.8Ni.15V.05	1.3	41	150	7	Oguro, 1983	78
AB	TiFe.8Ni.2	1	41.9	50	0.28	Mintz, 1981	390
AB	TiFe.8Ni.2	1.2		150	9	Oguro, 1983	78
AB	TiFe.8Ni.2	1.3	41.2	50	0.33	Huston, 1980	77
AB	TiFe.94Al.06	1.2		30	5	Lim, , 1984	548
AB	TiFe.95Cr.05 (M)	1.7		40	4	Reilly, 1976	383
AB	TiFe.95Mn.05 (M)	1.6	29.3	50	9	Mintz, 1981	390
AB	TiFe.95V.05 (M)	1.7		40	5	Reilly, 1976	383
AB	TiFe.96Nb.04	1.7		40	4	Sasaki, 1981	394
AB	TiFe.9Al.1	1.3	30	25	1.2	Bruzzone, 1981	422
AB	TiFe.9Al.1	1.3		50	3	Lee, 1999	1211			sloping plateau
AB	TiFe.9Co.1	1.5	30.6	50	5	Lee, 1999	1211
AB	TiFe.9Co.1	1.8		40	3.3	Reilly, 1976	383
AB	TiFe.9Cr.1	1.1	30.5	150	20	Someno, 1979	381
AB	TiFe.9Cr.1 (M)	1.7		40	1.6	Reilly, 1976	383
AB	TiFe.9Cu.1	1.2		40	2.3	Reilly, 1976	383
AB	TiFe.9Mn.1	1.2	27.2	100	30	Someno, 1979	381
AB	TiFe.9Mn.1 (M)	1.9	29.5	25	2.6	Johnson, 1978	330
AB	TiFe.9Mo.1	1.7		40	3	Reilly, 1976	383
AB	TiFe.9Ni.1	1.4	35.6	50	1.8	Lee, 1999	1211
AB	TiFe.9Ni.1	1.6		40	0.9	Reilly, 1972	195
AB	TiFe1-yAly	1.1	21 - 29	30	2017-03-08	Lim, 1984	547	(y=0.02-0.1)
AB	TiFe1-yAly	1.3		40	2017-04-07	Sandrock, 1978	321	(y=0.04-0.1)
AB	TiFe1-yAly	1.3		50	2017-03-10	Lee, 1999	1211	y=0.025-0.1
AB	TiFe1-yCoy	1	31 - 47	150	2017-04-30	Someno, 1979	381	(y = 0.25-0.75)
AB	TiFe1-yCoy (M?)		31 - 33	25	0.9 - 1.6	Mintz, 1981	390	(y = 0.1-0.2)
AB	TiFe1-yCry (M)		30 - 36	25	0.2 - 1	Mintz, 1981	390	(y = 0.1-0.2)
AB	TiFe1-yCry (M)	1.6		50	2017-02-05	Lee, 1994	391	(y = 0.05-0.1)
AB	TiFe1-yMny	1.6		27	0.5 - 2	Mitrokhin, 1993	593	(y=0.1-0.3)
AB	TiFe1-yMny	1.8		40	2017-01-06	Johnson, 1977	393	(y = 0.1-0.3)
AB	TiFe1-yMny (M)		28 - 32	25	0.8 - 3.4	Mintz, 1981	390	(y = 0.05-0.2)
AB	TiFe1-yMny (M)	1.7		50	2017-04-06	Lee, 1994	391	(y = 0.1-0.2)
AB	TiFe1-yNiy		35 - 45	25	0.005 - 0.6	Mintz, 1981	390	(y = 0.1-0.5)
AB	TiFe1-yNiy		49 - 54			Bershadsky, 1993	395
AB	TiFe1-yNiy	1.4		50	0.3 - 1.8	Lee, 1999	1211	y=0.1-0.3
AB	BeNi	1.5				Chernikov, 1983	432
AB	CeAg					Beck, 1962	45
AB	CeAl	0.8				Semenenko, 1985	1151
AB	CeNi					Beck, 1962	45
AB	CeNi	1.8		20	0.05 - 0.01	Verbetsky, 1991	1156
AB	DyAg					Beck, 1962	45
AB	DyAl					Beck, 1962	45
AB	ErAg	0.3	35.2	790	0.01	Philipp, 1991	384
AB	ErNi	1.4	105			Ensslen, 1983	385
AB	ErNi	1.5		22	2017-02-05	Verbetsky, 1991	1156
AB	GdAl					Beck, 1962	45
AB	GdCu					Beck, 1962	45
AB	GdMg	1.1				Reule, 2000	1216
AB	GdZn	0.9				Reule, 2000	1216
AB	GdZn.9Mg.1	0.7				Reule, 2000	1216
AB	HfAl	0.5		50	1	van Essen, 1979	386
AB	HfCo	1.2				Beck, 1962	45
AB	HfCo	1.3	43	270	1	Nemirovskaya, 1991	606
AB	HfCo	1.3				Mukai, 1999	1230
AB	HfCo	1.3	59	50	0.001	van Essen, 1979	386
AB	HfNi	1.3		50	0.7	Mukai, 1999	1230
AB	HfNi (M)	1.3	40	190	1	Nemirovskaya, 1991	606
AB	HfNi (M)	1.3	50	50	0.02	van Essen, 1979	386
AB	HfPd	0.2				Mukai, 1999	1230
AB	LaAg					Beck, 1962	45
AB	LaAl					Beck, 1962	45
AB	LaCd	1.1				Beck, 1962	45
AB	LaMg	1.8				Beck, 1962	45
AB	LaNi	1.3	118			Maeland, 1976	387
AB	LaNi	1.5				van Mal, 1976	103
AB	LaNi	1.6				Mikheeva, 1978	535
AB	LaNi	1.7		20	0.5 - 1	Verbetsky, 1991	1156
AB	LaNi	1.8				Oesterreicher, 1976	524
AB	LaNi	1.9	100			Busch, 1978	189
AB	LaNi	2	126			Ensslen, 1983	385
AB	LaNi	2				Anderson, 1973	99
AB	LaPt	0.8				Anderson, 1973	99
AB	LaZn					Beck, 1962	45
AB	Li.94Pd	0.9	69.2	300	0.02	Sakamoto, 1995	411
AB	LiPd	0.7	75.3			Nacken, 1977	388
AB	LiPt	0.6	134			Nacken, 1977	388
AB	LuNi	1.2	100			Ensslen, 1983	385
AB	PrAg					Beck, 1962	45
AB	PrAl	0.7				Semenenko, 1985	1151
AB	PrGa					Beck, 1962	45
AB	PrMg					Beck, 1962	45
AB	PrSb	0.2				Beck, 1962	45
AB	Sc1-xTixNi	1.5		25	0.1	Balema, 2000	1215	x=0-0.5
AB	TiFe1-yPdy	1.6		0	0.1 - 0.7	Yamashita, 1997	654	y = 0.05-0.2
AB	TiFe1-ySiy	1.3		40	2 - 3.5	Sandrock, 1978	321	(y=0.02-0.1)
AB	TiMn	1.9				Chernikov, 1983	432
AB	TiNi	1.3		200	1	Yamanaka, 1975	73
AB	TiNi	1.3		200	1	Hata, 1980	74
AB	TiNi	1.3				Pauurets, 1982	498
AB	TiNi	1.4	58			Burch, 1979	500
AB	TiNi	1.2				Reilly, 1966	489
AB	TiNiCr.1	1.2				Hata, 1980	74
AB	TiNiFe.1	1.1				Hata, 1980	74
AB	TiNiMn.1	1.1				Hata, 1980	74
AB	UCo	0.6	55	150	0.08	Yamamoto, 1991	398
AB	YAl					Beck, 1962	45
AB	YAl	1.2				Semenenko, 1985	1151
AB	YbNi	1.2	147			Ensslen, 1983	385
AB	YbPd	1	67			Ensslen, 1983	385
AB	YCu					Beck, 1962	45
AB	YNi					Beck, 1962	45
AB	Zr.5Hf.5Co	1.1	76.2	200	0.2	Konishi, 1995	858
AB	Zr.78Ti.19Mm.03Ni.97	1.7		232	0.4	Sandrock, 1987	336
AB	Zr.7Hf.3Co	1.4	80.3	200	0.03	Konishi, 1995	858
AB	Zr.7Ti.3Co.7Ni.3	1.1		100	0.2	Shimizu, 1999	1212
AB	Zr.96Mm.04Ni.9	1.7		232	0.13	Sandrock, 1987	336
AB	Zr.97Mm.03Ni.77Cu.19	1.6		232	0.11	Sandrock, 1987	336
AB	Zr.97Mm.03Ni.87Al.09	1.4		232	0.13	Sandrock, 1987	336
AB	Zr.97Mm.03Ni.96Sn.1	1.4		232	0.15	Sandrock, 1987	336
AB	Zr1.02Ni0.98	1.6				Simonovic, 1999	1220
AB	ZrAg (M)	0.5		280	2017-10-03	Deschanvres, 1964	497
AB	ZrCo	1.2	90	252	0.05	Devillers, 1989	399
AB	ZrCo	0.7		365	0.4	Reilly, 1966	489
AB	ZrCo	1.7	76.3	200	0.005	Konishi, 1995	858
AB	ZrCo	2	66	430	1	Nemirovskaya, 1991	606
AB	ZrCo (M)	1.6	67	200	0.013	Irvine, 1978	70
AB	ZrCo.84Ni.16 (M)	1.6	83	250	0.01	Irvine, 1980	400
AB	ZrNi	1.2	47.5	300	0.005	Luo, 1990	550
AB	ZrNi	1.7	40.1	250	0.2	Cantrell, 1995	409
AB	ZrNi	1.8	76.8	250	0.26	Libowitz, 1958	68
AB	ZrNi	1.9				Beck, 1962	45
AB	ZrNi	2	64	300	1	Nemirovskaya, 1991	606
AB	ZrNi.8Co.2	1.8		232	0.06	Sandrock, 1987	336
AB2	(Sc.4Y.4Ti.2)Co2	1.4				Burnasheva, 1981	64
AB2	(Ti.75Zr.25)1.05Mn.8Cr1.05V.05Cu.1	1.8		30	3	Park, 2001	1280
AB2	(Ti.75Zr.25)1+xMn.8Cr1.2	1.85		30	1.5 - 6	Park, 2001	1280	x=0-0.15
AB2	(Ti.8Zr.2)1+xMn.8Cr1.2	1.8		30	2017-03-09	Park, 2001	1280	x=0-0.15
AB2	Ca.25Mg.75Ni2	1.2				Oesterreicher, 1980	43
AB2	Ca.5Mg.5Ni2	1.7				Oesterreicher, 1980	43
AB2	CaAl1.8B.2 (M)	0.7		40	3	Tanaka, 1995	416
AB2	CaAl2	0.6				Beck, 1962	45
AB2	CaAl2	2.1				Shaltiel, 1978	66
AB2	CaMg2	5.4				Shaltiel, 1978	66
AB2	CaNi2	2.1	85	25	0.05	Oesterreicher, 1980	43
AB2	Ce(Fe1-xAlx)2	0.5				Raj, 1992	1164	x=0.7-0.85
AB2	Ce(Fe1-xAlx)2	1.6				Raj, 1992	1164	x=0-0.1	(amorp)
AB2	CeAl1.25Cr.75	0.6		21	0.05	Gross, 1996	630
AB2	CeAl1.5Co.5	1.1				Jacob, 1981	459
AB2	CeCo1.5Al.5	1.8				Jacob, 1981	459
AB2	CeCo1.5Ni.5	1.9				Jacob, 1981	459
AB2	CeCo2					Beck, 1962	45
AB2	CeCo2	1.4				Burnasheva, 1977	520
AB2	CeCo2	1.5		50	2017-10-05	van Essen, 1980	355
AB2	CeCo2	1.6				Guidotti, 1977	105
AB2	CeCo2	1.6				Jacob, 1981	459
AB2	CeCoAl	1.6				Jacob, 1981	459
AB2	CeCoAl					Kost, 1979	515
AB2	CeFe2					Beck, 1962	45
AB2	CeFe2	1.3				Burnasheva, 1977	520
AB2	CeFe2	1.6				Buschow, 1976	685
AB2	CeMg2	3.1	101	216	0.1	Verbetsky, 1989	1155
AB2	CeMg2	3.2				Kost, 1979	515
AB2	CeMg2	3.6				Gingl, 1997	650
AB2	CeMn.5Al.75	0.6		27		Spatz, 1997	823
AB2	CeMn.5Al.75 (M)	0.6		27		Spatz, 1997	823
AB2	CeMn1.5Al.5	1.3				Gross, 2000	1270		Deuterium
AB2	CeMnAl	0.9		21	0.05	Gross, 1996	630
AB2	CeMnAl (M)	1.1		27	0.4	Spatz, 1997	824
AB2	CeNi2					Beck, 1962	45
AB2	CeNi2	1.3				Burnasheva, 1977	520
AB2	CeNi2	1.5				Guidotti, 1977	105
AB2	CeNi2	1.5		50	2017-10-05	van Essen, 1980	355
AB2	CeNi2-yAly	0.8				Jacob, 1981	459	(y = 0.2-1.6)
AB2	CeNiAl	0.9				Bobet, 2001	1278
AB2	CeNiCo	1.6				Jacob, 1981	459
AB2	CeRu2	1.5		200		Shaltiel, 1977	14
AB2	Dy(Mn.99Fe.01)2	1.5				Przewoznik, 1999	1252
AB2	DyCo2	1.2				Cohen, 1980	517
AB2	DyCo2	1.3				Burnasheva, 1977	520
AB2	DyFe2	1.2				Cohen, 1980	517
AB2	DyFe2	1.3				Burnasheva, 1979	519
AB2	DyFe2 (M)	1.5	58	80	0.0001	Kierstead, 1980	356
AB2	DyFe2 (M)	2.7		21	0.03	Pourarian, 1980	357
AB2	DyMn2	0				Beck, 1962	45
AB2	DyMn2	1.2				Cohen, 1980	517
AB2	DyMn2	1.7				Przewoznik, 1996	525
AB2	DyNi2	0.7				Cohen, 1980	517
AB2	DyNi2	1.2				Burnasheva, 1979	519
AB2	DyNiAl					Kolomiets, 1997	651
AB2	ErCo2	1.2				Burnasheva, 1979	519
AB2	PrCo2	1.5				Burnasheva, 1979	519
AB2	PrGa2	0.1				Beck, 1962	45
AB2	PrNi2	1.5				Burnasheva, 1977	520
AB2	Sc.5Y.5Fe2	1.5				Burnasheva, 1981	64
AB2	ScCo2	1.3				Burnasheva, 1981	64
AB2	ScFe2	1.9				Burnasheva, 1981	64
AB2	ScFe2	2				Kost, 1979	515
AB2	ScFe2	2		140	1	Shilov, 1981	530
AB2	ScMn2	2.3	63			Shilov, 1983	531
AB2	ScMn2	2.4				Kost, 1979	515
AB2	ScMn2	2.4		140	1	Shilov, 1981	530
AB2	ScNi2	1.2				Burnasheva, 1981	64
AB2	ScRu2					Shaltiel, 1978	66
AB2	SmCo2	1.2				Kost, 1979	515
AB2	SmCo2	1.5		40	0.01	Kanematsu, 1989	558
AB2	SmFe2	1.1				Burnasheva, 1977	520
AB2	SmFe2	1.2				Kost, 1979	515
AB2	SmFe2	1.5				Christodoulou, 1993	686
AB2	SmMg2	0				Beck, 1962	45
AB2	SmMg2	1.5				Shaltiel, 1978	66
AB2	SmMn2					Kost, 1979	515
AB2	SmNi2	1.4				Burnasheva, 1977	520
AB2	SmNi2	1.4				Kost, 1979	515
AB2	SmNiAl	0.5				Kolomiets, 1997	825
AB2	SmRu2	1.3				Shilov, 1978	510
AB2	SmRu2	1.3				Kost, 1979	515
AB2	Tb.27Dy.73Fe2	1.5		200	0.15	Manwaring, 1993	379
AB2	TbCo2	1.2				Burnasheva, 1979	519
AB2	TbNi2	1.1				Burnasheva, 1977	520
AB2	TbNiAl	0.5				Yartys, 1998	1246
AB2	TbNiAl	0.6				Kolomiets, 1997	651
AB2	TbNiAl	0.6				Kolomiets, 1997	825
AB2	Th1.5Ce.5Al	0.4	133	650	0.0003	Van Vucht, 1963	492
AB2	ThMn2	1				Beck, 1962	45
AB2	ThNi2	0.6				Beck, 1962	45
AB2	ThNi2	1.1	44.7			Buschow, 1975	187
AB2	ThRu2	1.1				Shaltiel, 1977	14
AB2	ThZr2	0.5	413	910	0.08	Bartscher, 1988	556
AB2	Ti.25Zr.75Cr1.5Ni.5	1.4		40		Bououdina, 1998	1249			No plateau
AB2	Ti.35Zr.65Ni1.2V.6Mn.2Cr.2	1.55				Lee, 1997	1179
AB2	Ti.475Zr.475La.05Mn.8Cr.8Ni.4	1.8		40	2	Liu, 1995	415
AB2	Ti.52Zr.48Ni1.01V.39Cr.22Mn.21Fe.19Al.19	1.4		22	0.8	Chuang, 1999	1254			sloping plateau
AB2	Ti.5Zr.5(Mn.5Cr.5)1-y	1.6		40	1960-01-01	Liu, 1996	526	Niy (x=0-1.4)
AB2	Ti.5Zr.5(Mn1-yFey)1.5	0.8		100	1970-04-01	Komazaki, 1983	29	(y = 0.2-0.8)
AB2	Ti.5Zr.5Cr1.5Ni.5	1.4		40	2	Bououdina, 1998	1249			sloping plateau
AB2	Ti.5Zr.5Mn.9Cr.9Ni.4	1.6		40	3	Liu, 1996	526
AB2	Ti.5Zr.5Mn1.2Fe.3	1.9	39	120	1.5	Komazaki, 1983	29
AB2	Ti.5Zr.5Mn1.36Fe.34	1.5		100	3	Komazaki, 1983	29
AB2	Ti.5Zr.5Mn2	1.8	40	70	1.5	Gamo, 1979	34
AB2	Ti.5Zr.5Ni1.3V.7B.2	1.4				Miyamura, 1993	372	(B = Al, Cr, Fe, Mn)
AB2	Ti.5Zr.5V.5Mn.2Cr.2Ni.8+y	1.3			0.02 - 0.8	Yu, 1998	1245	y=0-0.2		sloping plateaux
AB2	Ti.5Zr.5V.5Ni1.3Zr.2	1.6	38.8			Verbetsky, 1999	1282			No plateau
AB2	Ti.6Zr.4Mn1.4Cr.4Cu.2	1.8	48	20	0.3	Gamo, 1979	35
AB2	Ti.6Zr.4Mn1.5Cu.3Si.2	0.9		20	11	Au, 1995	860
AB2	Ti.6Zr.4Mn1.6Cu.3Si.1	1.3		20	1	Au, 1995	860
AB2	Ti.6Zr.4Mn1.9Cu.1	1.7	40.6	20	0.5	Gamo, 1979	34
AB2	Ti.6Zr.4NiV.6Mn.2+yFe.2	1.6		30	0.4 - 3	Gao, 1995	403	(y = 0-0.4)
AB2	Ti.73Zr.27Mn1.25Cr.75Cu.1	1.7		20	4	Gamo, 1998	856
AB2	Ti.75Zr.25Cr1.5Ni.5	1.7		40	0.1	Bououdina, 1998	1249			sloping plateau
AB2	Ti.75Zr.25CrNi	1.5		40	1	Bououdina, 1998	1249			sloping plateau
AB2	Ti.77Zr.23Mn.67Cr.67Cu.67	1.6		30	8	Zhan, 1995	627
AB2	Ti.7Zr.3Mn1.9Mo.1	1.7	41	17	0.9	Gamo, 1979	34
AB2	Ti.8Zr.2Cr1.8		23	0	3	Andreev, 1984	684
AB2	Ti.8Zr.2CrMn		30	0	2	Andreev, 1984	684
AB2	Ti.8Zr.2Mn.6Ni1.4	1				Hsu, 2000	1276			No plateau
AB2	Ti.8Zr.2Mn.8Cr1.0Fe.2	1.8	28	20	12	Gamo, 1979	35
AB2	Ti.8Zr.2Mn1.2Cr.8	2	28.9	20	5	Machida, 1978	371
AB2	Ti.8Zr.2Mn1.2V.2Cr.6	1.9	30.5	20	2.2	Gamo, 1979	35
AB2	Ti.8Zr.2Mn1.4V.2Cr.4	1.9	29	20	9	Gamo, 1980	31
AB2	Ti.8Zr.2Mn1.5Cr.5	2	27.5	30	10	Hong, 1993	373
AB2	Ti.8Zr.2Mn1.5Cu.5	1.6	27	30	3	Hong, 1993	373
AB2	Ti.8Zr.2Mn1.5Fe.5	1.7	25.4	30	11	Hong, 1993	373
AB2	Ti.8Zr.2Mn1.5V.5	2	45.6	30	0.5	Hong, 1993	373
AB2	Ti.8Zr.2Mn1.6V.2Cr.2	1.9	30.5	20	2	Gamo, 1979	35
AB2	Ti.8Zr.2Mn1.7V.2Mo.1	2	35	14	1	Gamo, 1979	35
AB2	Ti.8Zr.2Mn1.8Mo.2	1.7	29	20	4	Gamo, 1980	31
AB2	Ti.8Zr.2Mn2-yMoy	1.65		20	2017-02-06	Gamo, 1980	31	(y = 0.1-0.3)
AB2	Ti.8Zr.2MnCr	1.8		30	10	Park, 2001	1280
AB2	Ti.8Zr.2NiV.5Mn.5	1.7		50		Lee, 1997	822
AB2	Ti.8Zr.2V.5Mn.5-yCryNi.8	1.3				Yu, 1998	1245	y=0-0.5		No plateaux
AB2	Ti.8Zr.2V.6Mn.2Pd.1Ni.8Fe.2	1.3	46.5	25	0.01	Yang, 1999	1180
AB2	Ti.8Zr.3Mn1.4La.05V.2Cr.2	1.8		20	0.07	Au, 1995	860
AB2	Ti.8Zr.3Mn1.4Mo.05Cu.05V.2Cr.2	1.9		20	0.18	Au, 1995	860
AB2	Ti.8Zr.3Mn1.4Mo.1V.1Cr.2	1.8		20	0.07	Au, 1995	860
AB2	Ti.8Zr.3Mn1.5V.4Cr.2	1.2		20	0.65	Au, 1995	860
AB2	Ti.8Zr.3Mn1.5V.4Cr.2	1.7		20	0.43	Au, 1995	860
AB2	Ti.8Zr.3Mn1.6Cr.2Al.1	0.7		20	3.4	Au, 1995	860
AB2	Ti.95Zr.05Cr1.2Mn.6Co.2	1.8		20	65	Hagstrom, 1999	1191
AB2	Ti.95Zr.05Cr1.2Mn.75V.05	1.8		20	36	Hagstrom, 1999	1191
AB2	Ti.95Zr.05Cr1.2Mn.7V.1	1.8		20	26	Hagstrom, 1999	1191
AB2	Ti.95Zr.05Cr1.2Mn.8	1.7	21.9	20	5.5	Hagstrom, 1998	1242
AB2	TiV1.4Cr.6	3.7				Jacob, 1981	459
AB2	TiV1.4Ni.6	2.9	28.8	60	0.4	Chen, 1994	1163
AB2	TiV1.5Fe.4Mn.1	3.3		50	7	Bernauer, 1987	610
AB2	TiV1.6Co.4	3.1				Jacob, 1981	459
AB2	TiV1.6Ni.4	3.3	33.2	120	1	Chen, 1994	1163
AB2	TiV1.8Ni.2	3.6	35.3	90	0.08	Chen, 1994	1163
AB2	TiV2-yFey	1.9				Jacob, 1981	459	(y = 0.2-0.8)
AB2	TiV2-yMny	2.2				Jacob, 1981	459	(y = 0.4-1)
AB2	TiVMn	2.4		70	2	Bernauer, 1989	344
AB2	TixCr1.2Mn.8	1.8	25 - 26	-10	4.6 - 10	Osumi, 1983	40	(x = 1.1-1.3)
AB2	TmFe2	1.1				Burnasheva, 1979	519
AB2	TmFe2	1.5				Gualtieri, 1976	516
AB2	TmFe2 (M)	1.6	56.8	80	0.003	Kierstead, 1982	374
AB2	TmNi2	1.25				Burnasheva, 1979	519
AB2	TmNiAl	0.6				Kolomiets, 1997	825
AB2	UMn2	0.16				Beck, 1962	45
AB2	UNiAl (M)	0.5	74.6	100	0.0003	Yamanaka, 1999	1260
AB2	UNiAl (M)	0.7		127	50	Yamamoto, 1998	1241
AB2	UTi2	1.9		400	0.2	Asada, 1995	628
AB2	UZr2	1.5				Asada, 1995	628
AB2	YbNi2					Ensslen, 1983	385
AB2	YCo2	1.7				Burnasheva, 1979	519
AB2	YCo2	1.8		25	0.05	Shaltiel, 1977	14
AB2	YCo2	2				van Essen, 1980	355
AB2	YCo2	2	31			van Mal, 1976	360
AB2	YFe1.8Co.2	2				Fujii, 1983	59
AB2	YFe2					Beck, 1962	45
AB2	YFe2	1.7				Burnasheva, 1977	520
AB2	YFe2	1.8				Fujii, 1983	59
AB2	YFe2	2				Buschow, 1975	518
AB2	YFe2	2				Buschow, 1976	685
AB2	YFe2	2.1		50	2017-10-05	van Essen, 1980	355
AB2	YFe2	2.1				van Mal, 1976	360
AB2	YFe2					Paul-Boncour, 2001	1279		P=10 kbars
AB2	YFe2 (M)			200	0.008	Paul-Boncour, 1997	819
AB2	YFe2 (M)	1.7		100	0.01	Paul-Boncour, 1997	648
AB2	YFe2 (M)	2.1		20	0.001	Kierstead, 1982	61
AB2	YMg2	2.3				Kost, 1979	515
AB2	YMn2	1.7				van Mal, 1976	360
AB2	YMn2	2.1				Przewoznik, 1996	525
AB2	YMn2	2.2				Latroche, 1998	1243
AB2	YNi2					Beck, 1962	45
AB2	YNi2	1.7				van Essen, 1980	355
AB2	YNi2	1.7	44			van Mal, 1976	360
AB2	YNi2	1.8				Burnasheva, 1977	520
AB2	YNi2	1.8				Nakhl, 2001	1277
AB2	YNiAl	0.7				Kolomiets, 1997	651
AB2	YNiAl	0.7				Kolomiets, 1997	825
AB2	YRu2	1.1		200		Shaltiel, 1977	14
AB2	Zr(B1-yCy)2	1.4	30 - 49	50	0.001 - 5	Shaltiel, 1979	51	(B = Fe, Co; C = V, Cr, Mn; y = 0.25-0.75)
AB2	Zr(Co1-yAly)2	0.2		20	0.1 - 30	Jacob, 1978	16	(y = 0-1)
AB2	Zr(Cr1-yMo)y	1.4				Bououdina, 2000	1287	y=0-0.5
AB2	Zr(Cr1-yNiy)2	1.6		23	2	Drasner, 1990	561	(y=0.125-0.5)
AB2	Zr(Cr1-yVy)2	1.9				Perevesenzew, 1988	557	(y=0.2-0.4)
AB2	Zr(CryCu1-.5yNi1-.5y)2	1.4				Soubeyroux, 1995	623	(y=0.6-0.9)
AB2	Zr(Fe.55Cr.55)2	1.5		45	0.7	Esayed, 1997	846
AB2	Zr(Fe.75Cr.25)2	1.4	25.6	45	3	Fang, 2000	1283
AB2	Zr(Fe.75Cr.25)2	1.5		45	2	Esayed, 1997	846
AB2	Zr(Fe1-yAly)2	0.1		20	0.1 - 25	Jacob, 1978	16	(y = 0-1)
AB2	Zr(FeyCr1-y)2	1.2		20	0.15 - 3	Ivey, 1986	377	(y = 0.45-0.8)
AB2	Zr(FeyCr1-y)2	1.4		30	0.1 - 5	Qian, 1989	376	(y = 0.5-0.8)
AB2	Zr(FeyMn1-y)2	0.9	24 - 35	40	0.2 - 20	Suzuki, 1983	30	(y = 0.5-0.8)
AB2	Zr(FeyMn1-y)2	1	6.5 - 22	100	2.5 - 60	Shitikov, 1984	552	(y = 0.3-0.9)
AB2	Zr(Mn.2V.2Ni.6)2-y	1.65		30	0.02 - 0.06	Lee, 2000	1272	y=0.1-0.4
AB2	Zr(Mn.4Ni.6)1.9	1.7		30	0.15	Lee, 2000	1272
AB2	Zr(Mn1-yNby)2.2	1.6		200	0.6 - 3	Kodama, 1996	584	(y=0-0.2)
AB2	Zr(Mn1-yNby)2.9	1.2		200	2017-05-10	Kodama, 1996	584	(y=0-0.2)
AB2	Zr(Ni.6V.2Mn.2)2.4	1.6	39.9	30	0.3	Gao, 1995	404
AB2	Zr(Ni.6V.4)2.4	1.6				Gao, 1996	586
AB2	Zr(V.2Mn.2Ni.6-yCoy)2.4	1.4		30	0.3 - 2	Gao, 1998	851	x=0-0.5
AB2	Zr(V1-xCrx)2					Mendelsohn, 1981	21
AB2	Zr.2Ho.8CoFe (M)	3.3	2017-02-16	27	9	Kesavan, 1998	826
AB2	Zr.2Ho.8Fe.5Co1.5	1.3	2017-10-30	27	4	Kesavan, 2000	1286			Sloping plateau
AB2	Zr.5Ti.5CrFe	1.8	27	23	4	Yu, 1985	555
AB2	Zr.5Ti.5Mn.4V.6Ni.85Al.15	1.6		30	0.02	Song, 2001	1238			sloping plateau
AB2	Zr.5Ti.5Mn.4V.6Ni.85Co.15	1.6		30	0.15	Song, 2001	1238			sloping plateau
AB2	Zr.5Ti.5Mn.4V.6Ni.85Cu.15	1.6		30	0.07	Song, 2001	1238			sloping plateau
AB2	Zr.5Ti.5Mn.4V.6Ni.85Fe.15	1.6		30	0.1	Song, 2001	1238			sloping plateau
AB2	Zr.5Ti.5Mn.4V.6Ni.85Mo.15	1.6		30	0.04	Song, 2001	1238			sloping plateau
AB2	Zr.5Ti.5Mn.4V.6Ni1-yFey	1.4		30	0.1 - 0.3	Song, 2000	1267	y=0-0.6		Sloping plateaux
AB2	Zr.5Ti.5Mn1.2Fe.3	1.6		150	3	Suzuki, 1982	26
AB2	Zr.65Ti.35(Mn.3V.14Cr.11Ni.43)1.76	1.7		30	0.03	Lee, 2000	1272
AB2	Zr.65Ti.35NixV2-x-yMny	1.2	36 - 39	40	0.05 - 0.4	Yang, 1995	402	(x = 1.0-1.2, y = 0.2-0.4)
AB2	Zr.6Ho.4Co2	1	29.3	50	2	Ramesh, 1993	363
AB2	Zr.6Ti.4Mn2	1.7		23	0.2	Fujii, 1981	18
AB2	Zr.75Ti.25Mn1.1Fe.9			23	0.9	Pedziwiatr, 1983	28
AB2	Zr.75Ti.25V1.7Fe.3	1.5				Jacob, 1981	459
AB2	Zr.76Ti.24Ni1.16Mn.63V.14Fe.18	1.6	29.7	30	5	Morii, 1995	410
AB2	ZrCr2Fe.8	1.2	46.5	100	0.8	Drasner, 1991	564
AB2	ZrCr2Ni.8	1.4	37.9	100	1	Drasner, 1991	564
AB2	ZrCr2-ySiy	1		200	1	Drasner, 1993	583	(y=0.25-0.5)
AB2	ZrCrCo.6V.4	1.6		180	1	Bououdina, 1996	585
AB2	ZrCrCo.8V.2	2.2		150	3	Bououdina, 1997	649
AB2	ZrCrFe	1.6	36	51	2	Yu, 1985	555
AB2	ZrCrFe1.2	1.4	34	120	7	Ivanova, 1999	1259			calor.
AB2	ZrCrFe1.6	1.2	29.1	30	2.5	Uchida, 1986	370
AB2	ZrCrFe1.6	1.3		23	2	Wallace, 1985	1168			sloping plateau
AB2	ZrCrFe1.8	1.3	19	23	6	Wallace, 1985	1168			sloping plateau
AB2	ZrCrFeCo.8	1.1	20	0	10	Wallace, 1985	1168			sloping plateau
AB2	ZrCrFeCu.8	1.2	28	23	3	Wallace, 1985	1168
AB2	ZrCrFeMn.8	1.4	32	23	0.6	Wallace, 1985	1168			sloping plateau
AB2	ZrCrFeNi.8	1.1	21	0	8	Wallace, 1985	1168			sloping plateau
AB2	ZrCrNi	1.3				Visintin, 2001	1291		at 80C	No plateau
AB2	ZrCrNi	1.4		30	8	Jung, 1998	1244
AB2	ZrFe1.4Cr	1.7	21	23	1	Sinha, 1985	554
AB2	ZrFe1.4Cr.6			23	0.8	Pedziwiatr, 1983	28
AB2	ZrFe1.4Cr.6	1.45		30	1	Davidson, 2001	1288
AB2	ZrFe1.4Cr.6	1.5	29.9	20	3	Ivey, 1984	29
AB2	ZrFe1.5Al.5	1		20	0.1	Jacob, 1978	16
AB2	ZrFe1.5Cr	1.5	23	23	1.5	Sinha, 1985	554
AB2	ZrFe1.5Cr.5	1.4	24.3	50	5.5	Shaltiel, 1977	14
AB2	ZrFe1.5Cr.5	1.5	25.6	20	5	Ivey, 1984	29
AB2	ZrFe1.5V.5	1.6	32.2	50	0.25	Shaltiel, 1977	14
AB2	ZrFe1.6Al.4	1	36	24	10	Fujii, 1982	22
AB2	ZrFe2	0				Padurets, 1978	513
AB2	ZrFe2	0.1				Shaltiel, 1977	14
AB2	ZrFe2	0.1				Semenenko, 1980	638
AB2	ZrFe2	0.15				Pebler, 1967	13
AB2	ZrFeCr	1.7	49.4	50	0.1	Shaltiel, 1977	14
AB2	ZrFeMn	1.6	31	150	10	Suzuki, 1982	27
AB2	ZrFeMnCr.25	1.6		45	0.5	Sinha, 1985	554
AB2	ZrFeMnNi.4	0.8		23	5	Sinha, 1985	554
AB2	ZrFeMo	1.2	29.8	30	0.6	Semenenko, 1980	638
AB2	ZrFeV	1.6	48.1	50	0.0012	Shaltiel, 1977	14
AB2	ZrMn.5V.5Ni1.4	1.6		30	0.2	Kim, 1999	1264			Sloping plateau
AB2	ZrMn.6Ni1.4	0.9		25	3.4	Hsu, 2000	1276
AB2	ZrMn.6V.2Co.1Ni1.2	1.6		40	0.9	Lai, 2000	1271
AB2	ZrMn.6V.2Co.1Ni1.2	1.6		25	0.5	Hsu, 2000	1276
AB2	ZrMn.6V.2Ni1.2	1.8		25	0.14	Hsu, 2000	1276
AB2	ZrMn.8Ni1.2	1.7		25	0.5	Hsu, 2000	1276
AB2	ZrMn1.11Fe1.22	1.3	29.4	30	2	Uchida, 1986	370
AB2	ZrMn1.11Fe1.22	1.5	13.3	100	5	Sinha, 1983	23
AB2	ZrMn1.22Fe1.11	1.5	13	23	1	Sinha, 1983	23
AB2	ZrMn1.22Fe1.14	1.2	31	40	2	Uchida, 1986	370
AB2	ZrMn1.2Fe0.4	1.5	33	50	0.4	Shaltiel, 1977	14	(+ ZrMnFe)
AB2	ZrMn1.52Co.4V0.08	1.2		200	8	Yonezu, 1991	563
AB2	ZrMn1.53Fe1.27	1	9	23	4	Sinha, 1983	23
AB2	ZrMn1.6Co.4	1.3		150	3	Yonezu, 1991	563
AB2	ZrMn1.8	1.2		50	0.06	van Essen, 1980	17
AB2	ZrMn1.8	1.6	38.8	50	0.1	Luo, 1992	582
AB2	ZrMn1.8Co0.2	1.2		200	6	Fujitani, 1991	368
AB2	ZrMn1.8Fe0.2	1.2		200	8	Fujitani, 1991	368
AB2	ZrMn1.8Ni0.2 (M)	1.1		200	6	Fujitani, 1991	368
AB2	ZrMn1.8V0.2	1.3		200	1	Fujitani, 1991	368
AB2	ZrMn2		38			Pedziwiatr, 1983	28
AB2	ZrMn2	0.45				Pebler, 1967	13
AB2	ZrMn2	1				Beck, 1962	45
AB2	ZrMn2	1.4		150	1	Yonezu, 1991	563
AB2	ZrMn2	1.5	36	210	3	Fujii, 1987	369
AB2	ZrMn2	1.5				Padurets, 1978	513
AB2	ZrMn2	1.7	37.4	50	0.01	Luo, 1992	582
AB2	ZrMn2	1.8	53.2	80	0.03	Shaltiel, 1977	14
AB2	ZrMn2	1.9				Jacob, 1980	65
AB2	ZrMn2.4	1.6		50	0.7	van Essen, 1980	17
AB2	ZrMn2.5	1.4	32	50	0.07	Luo, 1992	582
AB2	ZrMn2.6Fe.2	1.4	15	100	0.12	Pourarian, 1982	512
AB2	ZrMn2.7	1.3	33.6	100	3	Uchida, 1986	370
AB2	ZrMn2.8		29.9	23	0.3	Pedziwiatr, 1983	28
AB2	ZrMn2.8	1.5	18.4	23	0.4	Pourarian, 1981	19
AB2	ZrMn2.8	1.6		50	2	van Essen, 1980	17
AB2	ZrMn2.8Fe.4	1.2	23	100	0.12	Pourarian, 1982	512
AB2	ZrMn2.8Ni.4	1.3		23	4	Pourarian, 1984	551
AB2	ZrMn2Co.8		20.9	23	4	Pedziwiatr, 1983	28
AB2	ZrMn2Co.8	0.9	19.3	23	3.5	Pourarian, 1984	551
AB2	ZrMn2Cu.8		31.6	23	0.06	Pedziwiatr, 1983	28
AB2	ZrMn2Cu.8	1.4	27	50	0.06	Pourarian, 1984	551
AB2	ZrMn2Fe.8		25	23	0.5	Pedziwiatr, 1983	28
AB2	ZrMn2Fe.8	1.2	29.3	30	2	Uchida, 1986	370
AB2	ZrMn2Fe.8	1.4	12.7	23	0.7	Sinha, 1982	509
AB2	ZrMn2Fe1.2	0.7	6.8	25	3	Sinha, 1982	509
AB2	ZrMn2Ni.8		25	23	1.6	Pedziwiatr, 1983	28
AB2	ZrMn2Ni.8	1.3	18.6	23	3	Pourarian, 1984	551
AB2	ZrMn2-xVx	1.2		200	2017-01-02	Yonezu, 1991	563	(x=0.1-0.2)
AB2	ZrMn2-yCoy	1.5	35 - 44	50	0.08 - 1	Shaltiel, 1977	14	(y = 0.5-1.0)
AB2	ZrMn3	1.3	29.2	50	0.6	Luo, 1992	582
AB2	ZrMn3.8	1.2	17	30	0.7	Pourarian, 1981	19
AB2	ZrMnFe	0.1	20.4			Fukada, 1999	1255		0.4 atm at 0°C	No plateau
AB2	ZrMnFe.7Co.3	1.2	17.6	30	4	Prakash, 2000	1285			Sloping plateau
AB2	ZrMnNi1+y	0.3		30	0.45 - 2.5	Kwon, 2002	1294	y=0-0.4
AB2	ZrMo2	0.3	38.5			Pebler, 1967	13
AB2	ZrMo2	0.3				Beck, 1962	45
AB2	ZrMo2	0.4				Shaltiel, 1977	14
AB2	ZrMo2	0.5				Semenenko, 1980	638
AB2	ErCo2	1.3				Gualtieri, 1977	50
AB2	ErFe2	1.1				Burnasheva, 1979	519
AB2	ErFe2	1.4				Gualtieri, 1976	516
AB2	ErFe2	1.4				Gualtieri, 1977	50
AB2	ErFe2	1.4		205	1	Shilov, 1981	530
AB2	ErFe2	1.7		24	0.06	Shashikala, 1996	1165			sloping plateau
AB2	ErFe2					Paul-Boncour, 2001	1279		P=10 kbars
AB2	ErFe2 (M)	1.1	56.2	130	0.013	Flanagan, 1987	358
AB2	ErFe2 (M)	1.5	57.9	80	0.001	Kierstead, 1980	356
AB2	ErFe2-yAly	1.2				Gualtieri, 1977	50	(y = 0-0.6)
AB2	ErFe2-yCoy	1.3				Gualtieri, 1977	50	(y = 0-2)
AB2	ErFe2-yMny	1.4				Gualtieri, 1977	50	(y = 0-1.4)
AB2	ErFe2-yMny					Sankar, 1977	683	y=0.4-1.0
AB2	ErFe2-yNiy	1.3				Gualtieri, 1977	50	(y = 0-1.2)
AB2	ErMn2	1.75		22	0.02	Viccaro, 1980	359
AB2	ErNi2	0.9				Gualtieri, 1977	50
AB2	ErNi2	0.9				Ensslen, 1983	385
AB2	ErNi2	1.2				Burnasheva, 1979	519
AB2	ErNi2	1.5				Kost, 1979	515
AB2	ErNiAl	0.6				Kolomiets, 1997	651
AB2	ErNiAl	0.6				Kolomiets, 1997	825
AB2	GdCo2					Beck, 1962	45
AB2	GdCo2	1				Mushnikov, 1999	1257
AB2	GdCo2	1.4				Burnasheva, 1979	519
AB2	GdCo2	1.4	54			Buschow, 1977	54
AB2	GdCo2	1.5	31			van Mal, 1976	360
AB2	GdCo2	1.6				Shaltiel, 1977	14
AB2	GdCo2 (M)	1.5	48	200	2	Shaltiel, 1979	361
AB2	GdFe2					Beck, 1962	45
AB2	GdFe2	1.5				Buschow, 1975	518
AB2	GdFe2	1.5	29	292	1	Shaltiel, 1979	361
AB2	GdFe2 (M)	1.6		20	0.0001	Kierstead, 1982	61
AB2	GdFeAl	1.2		27	0.75	Drulis, 1984	553
AB2	GdMn2	0				Beck, 1962	45
AB2	GdMn2	1.1	87.5	360	1	Shaltiel, 1979	361
AB2	GdMn2	1.6				Przewoznik, 1996	525
AB2	GdNi2	1.3				Burnasheva, 1977	520
AB2	GdNi2	1.4				Malik, 1977	514
AB2	GdNi2	1.5	90	300	1	Shaltiel, 1979	361
AB2	GdNiAl	0.6				Kolomiets, 1997	651
AB2	GdNiAl	0.6				Kolomiets, 1997	825
AB2	GdNiAl	0.8		27	0.5	Drulis, 1984	553
AB2	GdRh2	0.9	49	142	6	Shaltiel, 1979	361
AB2	GdRh2	0.9		100	0.8	Shaltiel, 1977	14
AB2	GdRu2	1		200	0.7	Shaltiel, 1977	14
AB2	GdRu2	1	60	225	3	Shaltiel, 1979	361
AB2	Hf.57Ti.43Ni1.7V.3	0.8				Ronnebro, 1995	617
AB2	HfBe2	0.56				Maeland, 1983	362
AB2	HfCr2	1.2				Mukai, 1999	1230			No plateau
AB2	HfMn2	0.7				Mukai, 1999	1230			No plateau
AB2	HfMo2	0.2				Mukai, 1999	1230			No plateau
AB2	HfTi2	2.1				Kozhanov, 1998	1240
AB2	HfV2	0.9				Mukai, 1999	1230			No plateau
AB2	HfV2	1				Kemali, 1995	405
AB2	HfV2	1.1				Beck, 1962	45
AB2	Ho.6Zr.4Co2		30	27	0.06	Ramesh, 1991	682
AB2	Ho.6Zr.4Co2	1	33	50	0.2	Ramesh, 1993	363
AB2	Ho.6Zr.4Fe2		16 - 20			Kesavan, 1995	680
AB2	Ho.8Zr.2Co2		13	27	0.06	Ramesh, 1991	682
AB2	Ho.8Zr.2Co2	1.2	25	50	0.2	Ramesh, 1993	363
AB2	Ho.8Zr.2Fe2		24			Kesavan, 1996	681
AB2	HoCo2	1.3				Burnasheva, 1979	519
AB2	HoFe2	1.3				Burnasheva, 1979	519
AB2	HoFe2	1.6				Gualtieri, 1976	516
AB2	HoNi2	1.3				Burnasheva, 1979	519
AB2	HoRu2	1.1		155	1	Shilov, 1981	530
AB2	La1-xMgxNi2	1.2				Oesterreicher, 1980	364	(x = 0.25-0.67)
AB2	LaAl2	0.05				Shaltiel, 1978	66
AB2	LaCo2	1.5				Burnasheva, 1979	519
AB2	LaMg2	2.1				Shaltiel, 1978	66
AB2	LaMg2	3.3				Kost, 1979	515
AB2	LaMg2	3.6				Gingl, 1997	650
AB2	LaMnAl (M)	1.2		21	15	Gross, 1996	630
AB2	LaNi2	1.1				Guidotti, 1977	105
AB2	LaNi2	1.6				Mikheeva, 1978	535
AB2	LaNi2	1.7				Oesterreicher, 1980	364
AB2	LaNi2	1.7				Oesterreicher, 1976	524
AB2	LaNi2	1.8				Kost, 1979	515
AB2	LaNi2	1.9	79.5			Maeland, 1976	387
AB2	LaPt2					Shaltiel, 1977	14
AB2	LaRh2	1.4		200	0.7	Shaltiel, 1977	14
AB2	LaRh2 (M)	1.4	44.3	244	2	Shaltiel, 1979	361
AB2	LaRu2	1.3		200		Shaltiel, 1977	14
AB2	LiPd2	0.8	51	300	0.16	Sakamoto, 1995	411
AB2	LuFe2	1.4				Buschow, 1980	56
AB2	LuNi2	0.85				Burnasheva, 1979	519
AB2	LuNi2	0.9				Ensslen, 1983	385
AB2	LuNi2	1.4				Buschow, 1980	56
AB2	LuNiAl	0.4				Kolomiets, 1997	651
AB2	MgCu2	0				Reilly, 1967	87
AB2	MgNi2	0				Reilly, 1968	88
AB2	MgYNi4	1.05	35.8	40	4	Aono, 2000	1273
AB2	MmCo2	1.1				Guidotti, 1977	105
AB2	MmMnAl	1		21	0.05	Gross, 1996	630
AB2	NdCo2	1.4				Burnasheva, 1979	519
AB2	NdFe2	1.1				Burnasheva, 1977	520
AB2	NdMg2	2.05				Shaltiel, 1978	66
AB2	NdNi2	1.3				Burnasheva, 1977	520
AB2	PrCo2	1.5	67	100	0.001	Clinton, 1975	102
AB2	Ti.95Zr.05Cr1.2Mn.8	1.8		20	45	Hagstrom, 1999	1191
AB2	Ti.95Zr.05Mn1.45Al.5	1.4		25	21	Bobet, 2000	1239
AB2	Ti.95Zr.05Mn1.45Co.5	1.9		25	32	Bobet, 2000	1239
AB2	Ti.95Zr.05Mn1.45Cr.5	1.9		25	28	Bobet, 2000	1239
AB2	Ti.95Zr.05Mn1.45Ni.5	1.9		25	36	Bobet, 2000	1239
AB2	Ti.95Zr.05Mn1.45V.5	2		25	20	Bobet, 2000	1239
AB2	Ti.95Zr.05Mn1.48V.43Fe.08Al.01	1.9		20	6	Skripnyuk, 1999	1262
AB2	Ti.95Zr.05Mn1.95	1.9		25	29	Bobet, 2000	1239
AB2	Ti.95Zr.05Mn2-y	1.6		25	25	Bobet, 2000	1284	y=-0.05-0.35
AB2	Ti.98Zr.02Mn1.5V.43Fe.09Cr.05	1.9	27.4	20	9	Bernauer, 1989	341
AB2	Ti.98Zr.02V.43Fe.09Cr.05Mn1.5	1.6	23.3	20	20	Hahne, 1998	850
AB2	Ti.9Zr.15Mn1.6Cr.2V.2	2.1	15.4	25	7	Xu, 2001	1290
AB2	Ti.9Zr.1Cr1.8	3.4				Verbetsky, 1999	1281		at -77C	No plateau
AB2	Ti.9Zr.1Mn1.4Cr.45Fe.15	2.2		20	60	Verbetsky, 1998	1219		at -78C
AB2	Ti.9Zr.1Mn1.4Cr.4V.2	1.7		27	6	Morita, 1997	647
AB2	Ti.9Zr.1Mn1.4Cr.4V.2C.03	1.7		27	10	Morita, 1997	647
AB2	Ti.9Zr.1Mn1.4Cr.4V.2S.03	1.7		5	3	Morita, 1997	647
AB2	Ti.9Zr.2Mn1.4Cr.4(VFe).2	2.1	25.5	25	3	Xu, 2001	1290	VFe=ferrovanadium
AB2	Ti.9Zr.2Mn1.4Cr.4V.2	2.1	26.7	25	1.9	Xu, 2001	1290
AB2	Ti.9Zr.2Mn1.6Cr.2(VFe).2	2.1	30	25	7	Xu, 2001	1290	VFe=ferrovanadium
AB2	Ti.9Zr.2Mn1.6Ni.2(VFe).2	2	23.2	25	3.6	Xu, 2001	1290	VFe=ferrovanadium
AB2	Ti.9Zr.2Mn1.6Ni.2V.2	2.1	31.7	25	2.7	Xu, 2001	1290
AB2	Ti.9Zr.2Mn1.8(VFe).2	2	29.1	25	3	Xu, 2001	1290	VFe=ferrovanadium
AB2	Ti.9Zr.2Mn1.8V.2	2.1	26	25	3	Xu, 2001	1290
AB2	Ti.9Zr.3Mn1.3Cu.05Mo.05V.2Cr.2	2	15.2	20	0.06	Au, 1995	860
AB2	Ti0.85Zr.15MnCr.8V.1Cu.1	1.7		30	13	Liu, 1996	690
AB2	Ti0.9+xZr.1MnCr.9V.1	1.7		30	2017-12-24	Liu, 1996	690	x=0-0.15
AB2	Ti0.95-xZrxMnCr.9V.1	1.7		30	2017-10-24	Liu, 1996	690	x=0.15-0.2
AB2	Ti0.9Zr.1Mn1.4Cr.4V.2	1.8		30	13	Liu, 1996	690
AB2	Ti0.9Zr.1MnCr.9V.1	1.7	22.5	30	24	Liu, 1996	690
AB2	Ti0.9Zr.1MnCr1-yVy	1.8		30	2.7 - 13.6	Liu, 1996	690	y=0.2-0.4
AB2	Ti1.2Cr1.9Mn.1	1.8	20.1	-10	19.4	Osumi, 1983	40
AB2	Ti1.2CrMn	2	25.5	-10	5.7	Osumi, 1983	40
AB2	Ti1-xZrxCr2	0.8		20	1940-03-01	Machida, 1978	371	(x = 0-0.3)
AB2	Ti1-xZrxCrMn	2		-20	2.5 - 13	Bernauer, 1989	344	(x = 0-0.2)
AB2	Ti1-xZrxMn.8Cr1.2	1.8		30	2017-07-30	Park, 2001	1280	x=0.1-0.25
AB2	Ti1-xZrxMn1.7Cu.3	1.5		20	0.1 - 1	Gamo, 1980	31	(x = 0.3-0.5)
AB2	Ti1-xZrxMn2-y-zCryCuz	1.6		30	2017-01-30	Moriwaki, 1991	366	(x = 0-1, y = 0.5-1, z = 0-0.2)
AB2	Ti1-xZrxMnCr.9V.1	1.7		30	2017-10-24	Liu, 1996	690	x=0.1-0.15
AB2	Ti1-xZrxMny	1.7		20	2 - 6.5	Gamo, 1980	31	(x = 0-0.2, y = 1.5-1.8)
AB2	Ti1-xZrxNiV.6Mn.2Fe.2	1.6		30	0.7 - 2	Gao, 1995	403	(x = 0.2-0.4)
AB2	Ti1-xZrxV1.7Fe.3	2.8				Jacob, 1981	459	(x = 0.3-0.5)
AB2	TiBe2	4.4		22	1	Maeland, 1983	362
AB2	TiCo2					Shaltiel, 1978	66
AB2	TiCr1.2V.8	3.4				Jacob, 1981	459
AB2	TiCr1.4V.6	2.3				Jacob, 1981	459
AB2	TiCr1.7Fe.1	3.2				Verbetsky, 1999	1281		at -78C	No plateau
AB2	TiCr1.8		19	0	70	Andreev, 1984	684
AB2	TiCr1.8	1.9	19.7	-32	20	Beeri, 1999	1258
AB2	TiCr1.8 (M)	2.43	20.2	-20	40	Johnson, 1978	335
AB2	TiCr1.8Mo.2	2.6		-40	1	Kabutomori, 1995	479
AB2	TiCr1.8V.2	2.9		-40	0.2	Kabutomori, 1995	479
AB2	TiCr2	0.4				Beck, 1962	45
AB2	TiCr2	0.8	23	20	40	Machida, 1978	371
AB2	TiCr2	1.3				Jacob, 1980	65
AB2	TiCr2	1.3		-16	30	Reilly, 1976	490
AB2	TiCr2	1.8	29.7	-40	2	Kabutomori, 1995	479
AB2	TiCr2	1.8				Padurets, 1982	498
AB2	TiCrMn		24	0	18	Andreev, 1984	684
AB2	TiCrMn	1.7		-16	15	Reilly, 1976	490
AB2	TiCrMn	2.1	19.6	40	190	Beeri, 2000	1269		at T=-60C
AB2	TiCrMn.85Fe.3V.15	1.6	20.9	20	6	Hagstrom, 1998	1242
AB2	TiFe2	0				Semenenko, 1982	532
AB2	TiMn1.25Cr.25	2.1		20	6	Hong, 1991	365
AB2	TiMn1.28V.6Fe.15	2.15		20	8	Bernauer, 1984	521
AB2	TiMn1.2Fe.37	1.4		10	9	Gamo, 1980	36
AB2	TiMn1.2V.8	2.1		50	4.5	Bernauer, 1984	521
AB2	TiMn1.3Fe.11	1.7	32.7	24	6	Gamo, 1980	36
AB2	TiMn1.45Al.5	1.5		25	22	Bobet, 2000	1284
AB2	TiMn1.45Co.5	1.9		25	32	Bobet, 2000	1284
AB2	TiMn1.45Cr.5	1.9		25	38	Bobet, 2000	1284
AB2	TiMn1.45Ni.5	1.9		25	36	Bobet, 2000	1284
AB2	TiMn1.45V.5	2.1		25	20	Bobet, 2000	1284
AB2	TiMn1.4Fe.11	1.7		0	4.5	Gamo, 1980	36
AB2	TiMn1.4Ni.1		28	0	2	Andreev, 1984	684
AB2	TiMn1.4V.62	2.15		20	3.5	Bernauer, 1984	521
AB2	TiMn1.5		27	0	5	Andreev, 1984	684
AB2	TiMn1.5	1.5		22	5	Singh, 2001	1293
AB2	TiMn1.5	1.9	28.7	20	7	Gamo, 1981	31
AB2	TiMn1.5	1.9	27.9	0	1.8	Andreev, 1982	522
AB2	TiMn1.5V.45Fe.1	1.32		60	9	Hagstrom, 1998	1242	Hydralloy C0
AB2	TiMn1.95	2		25	31	Bobet, 2000	1284
AB2	TiMn2	0.06				Jacob, 1980	65
AB2	TiMn2	1.7	24.6	0	20	Klyamkin, 1994	688
AB2	TiMn2-y	0.8		50	1940-04-01	Someno, 1980	381	(y = 0.3-0.75)
AB2	TiMnV.5 (M)	2.6		25	0.2	Yu, 1997	821
AB2	TiMnV.9Cr.1	2.45		45	0.8	Bernauer, 1984	521
AB2	TiMnyB.1	1.7		20	2017-04-10	Gamo, 1980	31	(y = 1.3-1.4; B = Co, Cu, Fe, Ni, V)
AB2	TiV1.2Cr.4Fe.4	1		25 - 410		Sakuma, 1995	859
AB2	Zr.79Ti.21MnFe1.02	1.5	33	30	1.5	Uchida, 1986	370
AB2	Zr.7Ce.3Mn2 (M?)	1.6		100	0.6	Wallace, 1983	528
AB2	Zr.7Ti.3(Mn.2V.2CryNi.6-y)1.8	1.6		30	0.04 - 0.05	Lee, 2000	1272	y=0-0.15
AB2	Zr.7Ti.3Cr.3Mn.3V.4Ni1.0	1.8		50	0.2	Kim, 1999	1264			Sloping plateau
AB2	Zr.7Ti.3Cr.6Fe1.4	1.5	22	23	7	Wallace, 1985	1169
AB2	Zr.7Ti.3CrFe	1.7	30	23	0.8	Yu, 1985	555
AB2	Zr.7Ti.3Mn2	1.7		30	0.1	Fujii, 1981	18
AB2	Zr.7Ti.3Mn2Fe.8	0.8	14	25	2.6	Sinha, 1982	20
AB2	Zr.7Ti.3MnFe	1.7	10	23	2	Sinha, 1982	25
AB2	Zr.7Ti.3Ni1.0V.4Mn.3Cr.3	1.7		30	0.1	Liu, 1997	818
AB2	Zr.8Ce.2Mn2	1.6		100	0.25	Wallace, 1983	528
AB2	Zr.8Ti.2Cr.6Fe1.4	1.6	27	23	3	Wallace, 1985	1169
AB2	Zr.8Ti.2Cr1.25Mn	1.8		65	0.08	Sinha, 1985	554
AB2	Zr.8Ti.2Cr1-yFe1+y	1.2	26 - 29	30	0.4 - 6	Lee, 1990	378	(y = 0-0.4)
AB2	Zr.8Ti.2CrCo.8V.2	1.7		150	4	Bououdina, 1997	649
AB2	Zr.8Ti.2FeMn	1.4	30	30	1.6	Park, 1991	562
AB2	Zr.8Ti.2FeMnyCr1-y	1.4	30 - 33	30	0.4 - 1.6	Park, 1991	562	(y=0-1)
AB2	Zr.8Ti.2Mn.6Ni1.4	0.8		25	21	Hsu, 2000	1276
AB2	Zr.8Ti.2MnFe	1.7	11	23	1	Sinha, 1982	25
AB2	Zr.8Ti.2Ni1.1+yMn.8-yV.1	1.6	29 - 37	30	0.6 - 7	Morii, 1995	410	(y = 0-0.32)
AB2	Zr.8Ti.2Ni1.2V.6Co.2	1.8		67	4	Chen, 1997	820
AB2	Zr.8Ti.2Ni1.2V.6Mn.2	1.8		67	1	Chen, 1997	820
AB2	Zr.8Ti.2Ni1.2V.6Mo.2	1.8		67	3	Chen, 1997	820
AB2	Zr.8Ti.2Ni1.2V.6Si.2	1.9		67	2	Chen, 1997	820
AB2	Zr.8Ti.2Ni1.3Mn.7-yVy	1.62	31 - 35	30	2017-01-04	Morii, 1995	410	(y = 0-0.2)
AB2	Zr.8V.2Mn.6Ni1.4	0.2				Hsu, 2000	1276			No plateau
AB2	Zr.9Ti.1(Mn.7V.5Ni1.2)0.92	0.7		30	0.1	Kim, 1999	1250	y=0.84-1.0		sloping plateaux
AB2	Zr.9Ti.1(Mn.7V.5Ni1.2)y	1.5		30	0.03 - 0.2	Kim, 1998	1247	y=0.84-1.0		sloping plateaux
AB2	Zr.9Ti.1Cr.55Fe1.45	1.6	1.03	10	2	Park, 2001	1292
AB2	Zr.9Ti.1Cr1-yFe1+y	1.4	24 - 31	30	0.2 - 4	Lee, 1990	378	(y = 0-0.4)
AB2	Zr.9Ti.1CrCo.8V.2	1.7		150	4	Bououdina, 1997	649
AB2	Zr.9Ti.1CrFe	1.6		30	0.2	Park, 1993	687
AB2	Zr.9Ti.1CrFe.8V.2	1.8		150	2	Bououdina, 1997	649
AB2	Zr.9Ti.1CrNi	2				Visintin, 2001	1291		at 60C	No plateau
AB2	Zr.9Ti.1CrNi.8V.2	1.8		150	2	Bououdina, 1997	649
AB2	Zr.9Ti.1Mn.6V.2Co.1Ni1.1	1.6		40	0.5	Liu, 2000	1266
AB2	Zr.9Ti.1MnFe	1.5		30	0.6	Park, 1993	687
AB2	Zr.9Ti.1Ni1.1Mn.6V.2Co.1	1.6		40	0.7	Suda, 1998	861
AB2	Zr.9Ti.1Ni1.1V.2Mn.6Co.1	1.5		40	0.8	Gao, 1998	855
AB2	Zr.9Ti.1Ni1.3V.2Mn.6La.05	1.4		40	1.2	Gao, 1998	855
AB2	Zr.9Ti.1V.2Mn.6Co.1Ni1.1	1.5		40	4	Suda, 1999	1263
AB2	Zr.9Ti.1V.5Fe1.5	1.5		50	0.2	Park, 1993	687
AB2	Zr1-2xMmxTixFe1.4Cr.6	1.35				Davidson, 2001	1288	x=0.05-0.2		No plateaux
AB2	Zr1-xMmxFe1.4Cr.6	1.4				Davidson, 2001	1288	x=0.05-0.2		No plateaux
AB2	Zr1-xTix(Mn.2V.2Ni.6)1.8	1.6		30	0.02 - 0.2	Lee, 2000	1237	x=0-0.6		sloping plateaux
AB2	Zr1-xTix(Mn.2V.2Ni.6)1.8	1.6		30	0.02 - 0.2	Lee, 2000	1272	x=0-0.6		Sloping plateaux
AB2	Zr1-xTix(Ni.6Mn.3V.1Cr.05)2	1.2	21.8 - 26.8	40	2017-01-15	Du, 2001	1289	x=0-0.5		Sloping plateaux
AB2	Zr1-xTixCr.8Fe1.2	1.4	26 - 29	30	0.31 - 31.5	Lee, 1990	378	(y = 0-0.2)
AB2	Zr1-xTixCr1-yFe1+y	1.4	30 - 36	30	0.2 - 10	Park, 1990	560	(x=0-0.5; y = 0-0.5)
AB2	Zr1-xTixFe1.5V.5	1.4		50	0.2 - 1	Park, 1992	581	(x=0-0.3)
AB2	Zr1-xTixMn.7V.5Ni1.2	1.5		30	0.08 - 0.5	Kim, 1998	1247	x=0-0.2		sloping plateaux
AB2	Zr1-xTixMnFe	1.1	28 - 34	30	0.4 - 9	Park, 1992	581	(x=0-0.3)
AB2	Zr1-xTixNi.95Mn.55Cr.4V.1	1.5		25	0.1 - 7	Klein, 1998	1248	x=0.1-0.6
AB2	Zr1-xTixNi1.1Mn.6V.1Fe.2	1.6	26 - 35	30	1.2 - 10	Morii, 1995	410	(x = 0-0.4)
AB2	Zr1-xTixV1.2Cr.3Ni1.5	1.5	34.5 - 36.9			Lupu, 2000	1275	x=0.25-0.6		No plateaux
AB2	ZrAl2	0.35		20	0.1	Jacob, 1978	16
AB2	ZrBe2	2.1		22	0.01	Maeland, 1983	362
AB2	ZrCo1.5Al.5	1		20	0.4	Jacob, 1978	16
AB2	ZrCo1.5Mo.5	0.1				Semenenko, 1980	638
AB2	ZrCo1.5V.5	1.5	34.3	50	1.5	Shaltiel, 1977	14
AB2	ZrCo2					Pebler, 1967	13
AB2	ZrCo2	0.1				Padurets, 1978	513
AB2	ZrCo2	0.16				Shaltiel, 1977	14
AB2	ZrCoCr	1.6	40.2	50	0.7	Shaltiel, 1977	14
AB2	ZrCoV	1.8	49.4	50	0.0023	Shaltiel, 1977	14
AB2	ZrCoV.2Cr.8	1.5		100	2	Soubeyroux, 1999	1261	y=0-1
AB2	ZrCoV1-yCry	1.1				Soubeyroux, 1999	1261	y=0-1
AB2	ZrCr.6Fe1.4	1.5	27	23	0.8	Wallace, 1985	1169
AB2	ZrCr.8Co.8V.4	1.8		130	1	Bououdina, 1996	585
AB2	ZrCr1.2Fe.8	1.4	50.2	70	0.75	Boulghallat, 1993	375	(+ Fe1.2 & Fe1.5)
AB2	ZrCr1.2Ni.8	2	56.4	70	0.25	Boulghallat, 1993	375
AB2	ZrCr1.75Ge.25	1.3		200	1	Drasner, 1993	583
AB2	ZrCr1-yFe1+y	1.3	24 - 29	30	0.4 - 5	Lee, 1990	378	(y = 0.2-0.5)
AB2	ZrCr2		36			Pedziwiatr, 1983	28
AB2	ZrCr2	1.8				Beck, 1962	45
AB2	ZrCr2	1.8	42	27	0.003	Pebler, 1967	13
AB2	ZrCr2	1.8		100	0.3	Perevesenzew, 1988	557
AB2	ZrCr2	1.8				Trzeciak, 1956	483
AB2	ZrCr2	1.9				Padurets, 1978	513
AB2	ZrCr2	1.9				Kohlmann, 1999	1253
AB2	ZrCr2	1.9				Irodova, 2000	1268		Deuterium
AB2	ZrCr2	2				Shaltiel, 1977	14
AB2	ZrCr2	2.1				Jacob, 1980	65
AB2	ZrCr2	2.1				Semenenko, 1980	638
AB2	ZrCr2Co.8	1	45.3	100	2	Drasner, 1991	564
AB2	ZrMo2 (M)	1	22	-78	0.4	Semenko, 1996	1154
AB2	ZrMoCr	1.3	27.6	25	0.2	Mitrokhin, 1981	1148			sloping plateau
AB2	ZrNi1.2Cr.8	1.6		25	0.4	Sun, 1996	689
AB2	ZrNi1.2Cr.8La.05	1.7		25	0.2	Sun, 1996	689
AB2	ZrNi1.2Mn.5Cr.2V.1	1.6		70	3	Moriwaki, 1991	367
AB2	ZrNi1.2Mn.6Cr.2	1.45		70	4.5	Moriwaki, 1991	367
AB2	ZrNi1.4+yMn.3V.7	0.6		30		Kim, 1998	857	y=0-0.6
AB2	ZrNi1.4+yMn.5V.5	0.4		30	0.3 - 30	Kim, 1998	827	y=0-0.6
AB2	ZrNi1.4Mn.5V.5	1.6		30	0.3	Kim, 1998	827
AB2	ZrNiAl	0.3		40	0.001	Yoshida, 1995	622
AB2	ZrTi2	2				Skripov, 2000	1274		deuterium
AB2	ZrV.7Mn.5Ni1.2	1.6		60	0.1	Lee, 1999	1265
AB2	ZrV1.5-yCryNi1.5	1.2	42 - 50			Lupu, 1999	1256	y=0-0.3		No plateaux
AB2	ZrV2	2.1				Beck, 1962	45
AB2	ZrV2	2.1				Trzeciak, 1956	483
AB2	ZrV2	2.4	155			Pebler, 1967	13
AB2	ZrV2	2.7				Padurets, 1978	513
AB2	ZrxNi1.2Cr.4Mn.4	1.4		45	1950-01-01	Moriwaki, 1991	367	(x = 0.8-1.1)
AB2	ZrxTi1-x(FeyMn1-y)1.5	0.8				Suzuki, 1982	26	(x & y = 0.2-0.8)
AB2	ZrxTi1-xCr2	1.3				Jacob, 1980	65	(x = 0-1)
AB2	ZrxTi1-xMn2	0.06				Jacob, 1980	65	(x = 0-1)
AB5	(La,Ce,Nd,Pr)Ni5	1.4	29 - 31.7	25	2.3 - 6.1	Valoen, 2000	1200	La,Ce,Nd,Pr levels 0.04 and 0.18
AB5	(Mm,A)Ni5			30	13 - 21	Osumi, 1981	124	(A = Al, B, Mn,Cu,Si)
AB5	Ca.7Mm.3Ni5	1.9	26.6	25	3.8	Sandrock, 1978	113
AB5	Ca.85Mm.15Ni5	1.12	29.3	25	0.9	Liang, 2001	1203
AB5	Ca.8Mm.2Ni4.9Zn.1	1.08		30	1.1	Liang, 2001	1203
AB5	CaNi4B	1.2	55.7	27	0.01	Oesterreicher, 1980	43
AB5	CaNi5		42	22	0.08	Yagisawa, 1984	671	Lowest plateau only
AB5	CaNi5	0.3	62	22	0.04	Yagisawa, 1984	671	Lowest plateau only
AB5	CaNi5	1.2	33.9	25	0.7	Nahm, 1990	252
AB5	CaNi5 (M)	1.7	37.7	25	0.5	Oesterreicher, 1980	43
AB5	CaNi5 (M)	1.9	31.9	25	0.5	Sandrock, 1977	106
AB5	CaNi5 (M)	1.9	32.2	20	0.33	Yoshikawa, 1982	138
AB5	CaNi5-yZny	1.1		50	0.5 - 0.7	Liang, 2001	1203	y=0.15-0.3
AB5	Ce.5La.5Ni2.5Cu2.5	1.1	22.9	23	2.2	Pourarian, 1986	254
AB5	Ce.5La.5Ni5	1.4		20	10	Mordkovich, 1992	666
AB5	Ce.6La.4Ni5			20	14	Mordkovich, 1992	666
AB5	Ce.6La.4Ni5	1.5	22.3	25	28	Dayan, 1981	382
AB5	Ce.7La.3Ni4.6Al.4			20	2.7	Mordkovich, 1992	666
AB5	Ce.7La.3Ni4.95Al.05			20	13	Mordkovich, 1992	666
AB5	Ce.7La.3Ni5	1.4		20	16	Mordkovich, 1992	666
AB5	Ce.7La.3Ni5-yAly			20	3.2 - 21	Mordkovich, 1995	408	(y = 0.02-0.4)
AB5	Ce.8La.2Ni4.7Cu0.3	1.5	21	23	18	Klyamkin, 1995	407
AB5	Ce.8La.2Ni5	1.5	23.8	23	30	Klyamkin, 1995	407
AB5	Ce.8La.2Ni5-yCoy	1.5		20	2.6 - 4.2	Hagstrom, 1999	1191	y=0-1.5
AB5	Ce.8Pr.2Ni2.5Cu2.5	1.05		23	11	Pourarian, 1986	254
AB5	Ce0.2Pr0.8Co5 (M)	0.6	39	20	0.23	Burnasheva, 1978	1517			Lower plateau
AB5	Ce0.4Pr0.6Co5 (M)	0.6	38.5	20	1	Burnasheva, 1978	1517			Lower plateau
AB5	Ce0.5La0.5Ni5	1.4		20	10	Mordkovich, 1993	1525
AB5	Ce0.6Pr0.4Co5 (M)	0.6	38.5	20	1.26	Burnasheva, 1978	1517			Lower plateau
AB5	Ce0.7La0.7Ni5	1.4	25	20	11	Mordkovich, 1993	1525
AB5	Ce0.8La0.2Ni5	1.5	20.8	60	74	Salamova, 2002	1509
AB5	Ce0.8Pr0.2Co5 (M)	0.6	37	20	1.42	Burnasheva, 1978	1517			Lower plateau
AB5	Ce1-xLaxNi4Co			20	2017-05-20	Mordkovich, 1995	408	(x = 0.4-0.8)
AB5	Ce1-xLaxNi5			20	2017-12-20	Mordkovich, 1995	408	(x = 0.4-0.5)
AB5	CeCo5	0.5	40	20	1.45	Burnasheva, 1978	1518
AB5	CeCo5	0.65	29	50	6	Kuijpers, 1972	96
AB5	CeCo5	0.65				Guidotti, 1977	105
AB5	CeCo5 (M)	0.6	39	20	1.45	Burnasheva, 1978	1517			Lower plateau
AB5	CeCo5 (M)	1.7		21	1.2	Lakner, 1980	101
AB5	CeFe5	0.7		100	1	Reilly, 1972	195
AB5	CeFe5	0.7	82	100	0.07	Lundin, 1975	253
AB5	CeMn2.56Ni2.42	1				Burnasheva, 1981	1530
AB5	CeMn3Ni2	0.7				Burnasheva, 1981	1530
AB5	CeNi3.55Mn.4Al.3Co.75	1.2		25	4	Joubert, 1998	1186
AB5	CeNi4.25Mn.75	1.4	24.7	23	1.1	Pourarian, 1985	423
AB5	CeNi4.5Al.5	1.4	21.6	23	9	Pourarian, 1985	423
AB5	CeNi4.5Mn.5	1.2	25.4	23	7	Pourarian, 1985	423
AB5	CeNi5	1.4	14.2	25	50	Lundin, 1977	149
AB5	CeNi5	1.5	22.2	23	80	Klyamkin, 1995	407
AB5	CeNi5-yCuy	0.9	17	0	2017-02-06	Pourarian, 1982	130	(y = 2-3)
AB5	CFMNi4.3-yCoyMn.4Al.3	1.1				Reilly, 1999	1232	y=0 & 0.75 (CFM=cerium-free Mm)
AB5	DyNi4.25Ga.75	0.8	30.1	20	6	Miletic, 2000	1213
AB5	DyNi4.5Al.5	1	27.3	20	20	Sorgic, 1996	635
AB5	DyNi4Al	0.8	35.4	20	0.6	Sorgic, 1996	635
AB5	DyNi5-yGay	0.3		20	0.05 - 6	Miletic, 2000	1213	Y=0.75-2
AB5	ErNi3.5Al1.5	0.7	39.8	115	2.5	Sorgic, 1996	591
AB5	ErNi4.5Al.5	0.8	25.4	0	25	Sorgic, 1996	591
AB5	ErNi4Al	0.9	32.4	0	2.1	Sorgic, 1996	591
AB5	EuNi5	1.2	26	25	1.3	Gavra, 1985	280
AB5	GdCo5	0.4		21	24	van Mal, 1976	103
AB5	GdNi4.5Al.5	0.9	32.7	20	7	Sorgic, 1996	635
AB5	GdNi4Al	0.9	41.5	20	0.2	Sorgic, 1996	635
AB5	GdNi5	0.6		23	120	Anderso, 1973	99
AB5	GdNi5-yAly	0.3				Bobet, 1998	814	y=2.01-3.07
AB5	GdNi5-yAly	0.7	30 - 50	20	0.04 - 0.73	Bobet, 1998	814	y=0.5-1.74
AB5	HoNi4.5Al.5	0.9	24.1	0	22	Sorgic, 1996	635
AB5	HoNi4Al	0.9	35.9	60	4	Sorgic, 1996	635
AB5	LaNi3FeCu	1.1	37.2	22	0.33	Burnasheva, 1984	1528
AB5	LaNi4.25Al.75	1.13	44.1	40	0.054	Diaz, 1979	270
AB5	LaNi4.25Co.5Sn.25	1.38		25	0.4	Kumar, 1995	263
AB5	LaNi4.25Co.5Sn.25	1.4	42.5	25	0.5	Zhang, 1996	679
AB5	LaNi4.25Co0.75			40	1.65	Joubert, 2000	1512
AB5	LaNi4.33B.67 (M)	1		23	0.3	Spada, 1983	438
AB5	LaNi4.3Mn0.4Al0.3			40	0.079	Joubert, 2000	1512
AB5	LaNi4.3-yCoyMn.4Al.3	1.2				Reilly, 1999	1232	y=0-0.75
AB5	LaNi4.4B.6	0.62	33.5	25	0.3	Mendelsohn, 1980	380
AB5	LaNi4.4Zn.6	1.4	34.8	20	0.3	Rozdzynska-Kielbik, 2000	1198
AB5	LaNi4.55Al.45	1.6		80	2	Nakamura, 1994	590
AB5	LaNi4.55Al.45	1.3		40	0.3	Nasako, 1998	811
AB5	LaNi4.5Al.5			25	0.2	Latroche, 1995	620
AB5	LaNi4.5Al.5	1.2		100	2.1	Nakamura, 1997	809
AB5	LaNi4.5Al.5	1.3		20	0.1	Sakai, 1990	570
AB5	LaNi4.5Al.5	1.38	38.6	60	0.6	Mendelsoh, 1979	265
AB5	LaNi4.5Al.5	1.4	44.4	25	0.3	Oh, 1998	1187
AB5	LaNi4.5Cr.5	1.3		20	0.4	Sakai, 1990	570
AB5	LaNi4.5Cu.5	1.3		20	1.1	Sakai, 1990	570
AB5	LaNi4.5Mn.5	1.4		100	1.6	Nakamura, 1997	809
AB5	LaNi4.5Mn.5	1.4		50	0.4	Nakamura, 2000	1207			sloping plateau
AB5	LaNi4.5Mn.5			25	0.1	Percheron, 1994	269
AB5	LaNi4.5Mn.5	1.5		20	0.15	Sakai, 1990	570
AB5	LaNi4.5Mn0.3Al0.3	1.3	39.3	35	0.2	Filatova, 2000	1524
AB5	LaNi4.5Pd.5 (M)	1.28		25	2.1	Goodell, 1980	256
AB5	LaNi4.5Si.5	1	36.5	25	0.5	Meli, 1992	674
AB5	LaNi4.61Mn.26Al.13	1.4		100	3.4	Nakamura, 1997	809
AB5	LaNi4.65Mn0.2Al0.15	1.5	38.8	20	0.6	Verbetsky, 1989	1529
AB5	LaNi4.6Al.4			20	0.3	Mordkovich, 1992	666
AB5	LaNi4.6Al.4	1.38	36.4	48	0.64	Mendelsoh, 1979	265
AB5	LaNi4.6Cu0.3Mn0.1	1.4	32	35	1	Ganich, 1999	1521
AB5	LaNi4.6Ga.4		35	20	0.3	Mendlesohn, 1978	116
AB5	LaNi4.6Ge.4	1.2	34.3	30	0.78	Mendlesohn, 1979	486
AB5	LaNi4.6Ge0.4	1.1	34	100	8	Luo, 2002	1514
AB5	LaNi4.6In.4	1.2	39.8	20	0.05	Mendlesohn, 1978	116
AB5	LaNi4.6Mn.4	1.4		50	0.4	Bagchi, 1997	1167
AB5	LaNi4.6Mn.4	1.49	39.4	25	0.15	Lundin, 1978	272
AB5	LaNi4.6Mn0.4			40	0.31	Joubert, 2000	1512
AB5	LaNi4.6Si.4	1	35.6	30	0.67	Mendlesohn, 1979	486
AB5	LaNi4.6Si.4	1		25	1.2	Ting, 1998	864	Gas atomized
AB5	LaNi4.6Si0.4	1	34.2	100	12	Luo, 2002	1514
AB5	LaNi4.6Sn.4	1.26	38.5	20	0.08	Mendlesoh, 1978	116
AB5	LaNi4.6Sn0.4	1.1	38.2	100	4	Luo, 2002	1514
AB5	LaNi4.75Al.25	1.4		50	1	Nakamura, 2000	1207
AB5	LaNi4.75Al0.25	1.2	33.7	35	1.2	Filatova, 1999	1522
AB5	LaNi4.75Sn.25	1.3		25	0.4	Ting, 1998	864		Gas atomized + annealed
AB5	LaNi4.75Sn.25	1.3		23	0.6	Bowman, 1997	642	Gas atomized
AB5	LaNi4.7Al.3	1.37	29.7	50	1.2	Groll, 1989	266
AB5	LaNi4.7Al.3	1.44	34	25	0.42	Huston, 1980	77
AB5	LaNi4.7Al0.3	1.3	34.9	20	0.7	Verbetsky, 1989	1529
AB5	LaNi4.7Al0.3	1.4		40	0.63	Joubert, 2000	1512
AB5	LaNi4.7Ge.3	1.3		23	0.7	Witham, 1996	511
AB5	LaNi4.7Mn0.3	1.4	36.2	20	0.9	Verbetsky, 1989	1529
AB5	LaNi4.7Si.3	1.1	33.8	25	1	Meli, 1992	674
AB5	LaNi4.7Si.3	1.1		27	0.5	Srivastava, 1998	817
AB5	LaNi4.7Sn.3	1.2		45	0.48	Hightower, 1998	1166		annealed
AB5	LaNi4.7Sn.3	1.37		25	0.3	Goodell, 1980	256
AB5	LaNi4.82Si0.25	1.6		20	1.1	Jain, 2002	1534
AB5	LaNi4.84Sn.32	1.2		38	0.7	Vogt, 1999	1178
AB5	LaNi4.85In.15		31.8	30	0.78	Mendlesohn, 1980	487
AB5	LaNi4.8C.2	1.4		25	2	Goodell, 1980	256
AB5	LaNi4.8Fe.2	1.3		50	6	Nakamura, 1996	631
AB5	LaNi4.8Fe.2	1.5		50	7	Nakamura, 1998	816
AB5	LaNi4.8Sn.2	1.4		25	0.5	Cantrell, 1994	589
AB5	LaNi4.8Sn.2	1.4	29.4	25	0.8	Zhang, 1996	679
AB5	LaNi4.8Sn.2	1.4	32.8	25	0.47	Luo, 1995	275
AB5	LaNi4.8Sn0.2	1.2	33.5	35	1.1	Filatova, 1999	1522
AB5	LaNi4.93In.07		35.2	30	1.37	Mendlesohn, 1980	487
AB5	LaNi4.95Sn.05	1.2		100	10.7	Luo, 1997	640
AB5	LaNi4.95Sn.05	1.3	32	100	14	Luo, 1998	815
AB5	LaNi4.9Al.1	1.5		25	1.2	Goodell, 1980	256
AB5	LaNi4.9Al0.1			40	2.23	Joubert, 2000	1512
AB5	LaNi4.9Al0.1	1.4	33	35	1.5	Filatova, 2001	1527
AB5	LaNi4.9Mn0.1	1.4	29	35	1.5	Ganich, 1999	1521
AB5	LaNi4.9Sn0.1	1.3	32	35	2.1	Filatova, 2001	1527
AB5	LaNi4Ag	1.1		40	2.4	Van Mal, 1974	98
AB5	LaNi4Al	1				Yartys, 1982	1519		Deuterium
AB5	LaNi4Al	1.1		20	0.001	Sakai, 1990	570
AB5	LaNi4Al0.5Cu0.5	1.4	40	22	0.09	Burnasheva, 1984	1528
AB5	LaNi4Co	1.4		40	1.2	Van Mal, 1974	98
AB5	LaNi4Co			25	1	Percheron, 1994	269
AB5	LaNi4Co (M)			25	1	Latroche, 1998	813
AB5	LaNi4Co.6Al.4	1.5		60	8	Mishima, 1963	605	(Rapidly solidified)
AB5	LaNi4Cr	0.54	34	25	0.04	Misawa, 1979	118
AB5	LaNi4Cr	0.8		20	0.3	Sakai, 1990	570
AB5	LaNi4Cr	1.1		40	0.9	Van Mal, 1974	98
AB5	LaNi4Cu			40	1.83	Joubert, 2000	1512
AB5	LaNi4Cu	1	33.9	60	4	Mendelsohn, 1977	168
AB5	LaNi4Cu	1.2		20	0.5	Sakai, 1990	570
AB5	LaNi4Cu	1.32		40	1.6	Van Mal, 1974	98
AB5	LaNi4Fe			40	0.97	Joubert, 2000	1512
AB5	LaNi4Fe	0.8	34.5	40	0.11	Misawa, 1979	118	(+ Fe2.5)
AB5	LaNi4Fe	1		40	1.1	Van Mal, 1974	98
AB5	LaNi4Fe0.5Cu0.5	1.3	36.1	22	0.48	Burnasheva, 1984	1528
AB5	MmCo3.5Ni1.5	0.72		25	3.1	Guidott, 1977	105
AB5	MmCo4.25Ni0.75	0.77		25	1.25	Guidott, 1977	105
AB5	MmCo5	0.7	40.2	40	1.8	Osumi, 1978	117
AB5	MmCo5	0.7	32.8	25	1.1	Kitada, 1977	507
AB5	MmNi3.05Co.95Al.16Mn.12	1.3		40	0.18	Imoto, 1999	1188
AB5	MmNi3.31Co.64Mn.37Al.28	1.4		20	0.3	Naito, 1993	1161
AB5	MmNi3.4Co1.0Mn.4Cu.2	1.4		30	0.7	Hu, 1998	1184			sloping plateau
AB5	MmNi3.4Co1.0Mn.5Al.1	1.4		30	0.2	Hu, 1998	1184			sloping plateau
AB5	MmNi3.4Co1.0Mn.5Al.1	1.4		30	0.1	Hu, 1998	1184	(annealed)
AB5	MmNi3.55Co.75Mn.4Al.3	1.3		30	0.2	Hu, 2000	1197
AB5	MmNi3.55Co.75Mn.4Al.3By	1.1	40.6 - 44.5	20	0.05 - 0.09	Ye, 2000	1214	y=0-0.3
AB5	MmNi3.55Co.75Mn.6Al.1	1.5		25	0.15	Wu, 1997	808
AB5	MmNi3.55Co.75Mn.7-yAly	1.3		25	0.04 - 0.2	Wu, 1997	808	y=0-0.4
AB5	MmNi3.55Co0.75Mn0.4Al0.3B0.3	0.9		60	2	Ye, 2002	1516	Mm=Ce-rich Mm, pure B added
AB5	MmNi3.55Co0.75Mn0.4Al0.3B0.3	0.9		60	0.3	Ye, 2002	1516	Mm=La-rich Mm, Fe-B added
AB5	MmNi3.55Co0.75Mn0.4Al0.3B0.3	1		60	0.5	Ye, 2002	1516	Mm=La-rich Mm, Ni-B added
AB5	MmNi3.56Co.7Al.4Mn.3	1.3		22	1	Gamboa, 2001	1209
AB5	MmNi3.5Co.7Al.8	1.24	39.8	40	0.23	Sakai, 1992	278
AB5	MmNi3.5Co.8Al.4Mn.3	1.2		23	0.2	Bowman, 1997	642	Gas atomized
AB5	MmNi3.5Co.8Mn.5Si.1	1.3		30	0.2	Hu, 1998	1184			sloping plateau
AB5	MmNi3.5Cu.5	1.13	23.4	25	8	Sandrock, 1978	113
AB5	MmNi3.61Mn.3Al.4Co.69	1.3		22	0.07	Latroche, 1999	1193
AB5	MmNi3.6Co.8Mn.4Al.2	1.4		30	0.2	Hu, 1998	1184			sloping plateau
AB5	MmNi3.6Co0.7Mn0.3Al0.4	1.1		45	0.2	Zhang, 1999	1218	La-rich Mm		sloping plateau
AB5	MmNi3.8Co1.0Mn0.4	1.4		30	0.6	Hu, 1998	1184			sloping plateau
AB5	MmNi3.94Mn.3Al.4Co.36	1.3		22	0.1	Latroche, 1999	1193
AB5	MmNi3.9Mn.4Fe.38Al.3Cu.02	1		40	0.75	Yasuda, 1997	643
AB5	MmNi3.9Mn.4Fe.38Al.3Cu.22	1		40	0.6	Yasuda, 1997	643
AB5	MmNi3.9Mn.4Fe.38Al.3Cu.42	0.9		40	0.45	Yasuda, 1997	643
AB5	MmNi3.9-yMn.4AlyCo.7	1.1		25	0.01 - 4	Senoh, 2000	1181	y=0-0.8		sloping plateaux
AB5	MmNi3Co2	1.4	32.7	20	2.9	Osumi, 1979	121	(+ Co1.0 & Co2.5)
AB5	MmNi4.15Fe.85	1.14	25.3	25	11.2	Huston, 1980	77
AB5	MmNi4.15Fe.85	1.14	29	18	6	Ron, 1987	276
AB5	MmNi4.2Al.4Co.4	1.3	28.4	30	5	Iwakura, 1995	1177
AB5	MmNi4.2Al.4Cr.4	1.3	31.8	30	2	Iwakura, 1995	1177
AB5	MmNi4.2Al.4Fe.4	1.1	30	30	3	Iwakura, 1995	1177
AB5	MmNi4.2Al.4Mn.4	1.4	31	30	2	Iwakura, 1995	1177
AB5	MmNi4.2Al.8	0.6		25	0.8	Mungole, 2000	1206	Fe-containing Indian Mm
AB5	MmNi4.2Al.8	0.7		15	0.5	Mungole, 1997	849
AB5	MmNi4.2Al.8	0.7		15	0.2	Mungole, 1999	1205	Fe-containing Indian Mm
AB5	MmNi4.2Al.8	1.1	31	30	0.5	Iwakura, 1995	1177
AB5	MmNi4.2Al0.8	1.3		0.1	20	Jurczyk, 2000	1508
AB5	MmNi4.2Co.2Mn.3Al.3	1.38	36.5	40	0.4	Takeya, 1993	279
AB5	MmNi4.2Mn.8	1		15	2	Mungole, 1997	849
AB5	MmNi4.2Mn.8	1		15	3	Mungole, 1999	1205	Fe-containing Indian Mm
AB5	MmNi4.3Al.7	1.16		25	0.6	Goodell, 1980	256
AB5	MmNi4.3-yCoyMn.4Al.3	0.9				Reilly, 1999	1232	y=0 & 0.75
AB5	MmNi4.3-yMn.33Al.4Coy	1.2		60	0.15 - 0.25	Cocciantelli, 1997	644	y=0.38-0.72
AB5	MmNi4.4Al.6	1.2	30	30	2	Iwakura, 1995	1177
AB5	MmNi4.4-yCoyMn.3	1.4		40	0.1 - 1	Takeya, 1993	279	Al.3 (y=0.2-0.8)
AB5	MmNi4.5Al.5	1.1		25	1.8	Kim, 1990	673
AB5	MmNi4.5Al.5	1.17	23	30	3.2	Osumi, 1979	119
AB5	MmNi4.5Al.5	1.2	28	25	3.8	Sandrock, 1978	113
AB5	MmNi4.5Al.5	1.45		30	3	Jain, 2000	1208
AB5	MmNi4.5Al.5Zry	0.9		30	2.5 - 5	Na, 1994	277	(y = 0-0.2)
AB5	MmNi4.5Al0.5	1.6		22	2.1	Jain, 2002	1533
AB5	MmNi4.5Cr.5	1.2	25.5	20	4.8	Suzuki, 1981	125	(+ Cr.75 & Cr1.0)
AB5	MmNi4.5Cr.5-zMnz			20	2017-02-05	Osumi, 1981	126	(z = 0-0.25)
AB5	MmNi4.5Mn.5	1.3	17.6	20	2.1	Osumi, 1979	120	(+ Mn.25, Mn.75, Mn1.0)
AB5	MmNi4.5Mn.5	1.49	28	20	2.7	Wang, 1989	267
AB5	MmNi4.5Mn.5Zry	0.9	30 - 32	25	2 - 2.2	Wang, 1989	267	(y = 0.025-0.2)
AB5	MmNi4.5Si.5	0.91	27.6	20	8	Osumi, 1982	127	(+ Si.4, Si.6, Si.8)
AB5	MmNi4.6Al.2Fe.2V.03	1.3	27.9	21	6	Lee, 1996	676
AB5	MmNi4.6Al.2Fe.2V.03	1.4	28.1	30	9	Lee, 1996	451
AB5	MmNi4.6Al.4	0.8		15	4	Mungole, 1997	849
AB5	MmNi4.6Al.4	0.8		15	4	Mungole, 1999	1205	Fe-containing Indian Mm
AB5	MmNi4.6Al.4	1.4	28	30	5	Iwakura, 1995	1177
AB5	MmNi4.6Fe.4	1.5		30	18	Venkateswara Sarma, 2001	1210
AB5	MmNi4.6Mn.4	0.9		15	8.2	Mungole, 1999	1205	Fe-containing Indian Mm
AB5	MmNi4.6Mn4	0.9		15	8	Mungole, 1997	849
AB5	MmNi4.6Sn.4	0.6	29.4	15	4.7	Balasubramaniam, 1993	588	(Mm=Indian [high-Fe])
AB5	MmNi4.6Sn.4	0.6		15	5	Mungole, 1999	1205	Fe-containing Indian Mm
AB5	MmNi4.6Sn4	0.6		15	5	Mungole, 1997	849
AB5	MmNi4.7Al.3	1.2		25	6	Fernandez, 1998	853	Brazilian Mm
AB5	MmNi4.7Al.3	1.2		25	6	Fernandez, 1998	1204	Brazilian Mm
AB5	MmNi4.7Al.3Zry	1.1	27 - 33	25	4.5 - 6	Wang, 1989	267	(y = 0-0.2)
AB5	MmNi4Al	1.1	32	30	0.1	Iwakura, 1995	1177			sloping plateau
AB5	MmNi4Cu0.7Ti0.1Sn0.1Fe0.1	1.4	37.3	22	7.4	Petrova, 1989	1520
AB5	MmNi4Cu0.7Ti0.1Sn0.1V0.1	1.4	37.1	22	6	Petrova, 1989	1520
AB5	MmNi5	1.4	23.7	23	13.5	Verbetsky, 1996	634
AB5	MmNi5	1.4	22 - 25.1	23	12.6 - 20	Fyodorov, 1997	847	1-15 wt.% excess Mm
AB5	MmNi5	1.37	14.2	25	20	Lundin, 1977	149
AB5	MmNi5	1.4		25	30	Sandrock, 1977	106
AB5	MmNi5	1.44	26.4	30	20.5	Osumi, 1979	119
AB5	La.4Ce.2Ca.5Ni3.55Co.75Mn.4Al.3	1.2		22	0.1	Visintin, 1996	633
AB5	La.5Ce.4Ti.1Ni3.77(CuFeCr).6Mn.36Al.27	1.2		30	0.5	Hu, 1999	1190			sloping plateau
AB5	La.65Nd.2Pr.15Ni3.55Co.75Mn.4Al.3	1.4		23	0.5	Zhang, 1998	1183			sloping plateau
AB5	La.6Ca.4Ni5 (M)	1.7		38	1.1	Shinar, 1978	113	(+ other Ca levels)
AB5	La.6Ce.4Ni3.77(CuFeCr).6Mn.36Al.27	1.3		30	0.2	Hu, 1999	1190			sloping plateau
AB5	La.6Ce.4Ni3.77Co.6Mn.36Al.27	1.4		30	0.5	Hu, 1999	1190			sloping plateau
AB5	La.7Sm.3Ni4Fe	1.15		50	6	Nakamura, 1996	631
AB5	La.7Sm.3Ni4Fe	1.3		50	6	Nakamura, 1998	816
AB5	La.8Ba.2Ni5	1.3		25	3	Goodell, 1980	256
AB5	La.8Ca.2Ni5	1.6		25	1.5	Goodell, 1980	256
AB5	La.8Ce.2Ca.1Ni3.55Co.75Mn.4Al.3	1.45		22	0.1	Visintin, 1996	633
AB5	La.8Ce.2Ni4.25Co.5Sn.25	1.2	38.2	25	0.8	Zhang, 1996	679
AB5	La.8Ce.2Ni4.8Sn.25	1.2	32.4	25	1.1	Zhang, 1996	679
AB5	La.8Ce.2Ni4.8Sn.25	1.3		25	1.1	Kumar, 1995	263
AB5	La.8Ce.2Ni4.98Al.02			20	4.2	Mordkovich, 1992	666
AB5	La.8Er.2Ni5 (M)	1.45		40	11	Van Mal, 1974	98
AB5	La.8Gd.2Ni5	1.5		40	8.9	Van Mal, 1974	98
AB5	La.8Nd.2Ni2.4Co2.5Si.1	1.3		20	0.2	Notten, 1995	412
AB5	La.8Nd.2Ni5	1.5		40	5.7	Van Mal, 1974	98
AB5	La.8Sr.2Ni5	1.48		25	1.7	Goodell, 1980	256
AB5	La.8Th.2Ni5	1.41		40	17	Van Mal, 1974	98
AB5	La.8Y.2Ni4.8Mn.2	1.6		25	0.38	Nasako, 1998	811
AB5	La.8Y.2Ni4.8Mn.2	1.4		0	1.1	Nakamura, 1996	450
AB5	La.8Y.2Ni5	1.5		40	10	Van Mal, 1974	98
AB5	La.8Zr.2Ni5	1.3		40	6	Van Mal, 1974	98
AB5	La.9Mg.1Ni5	1.4		25	2.3	Goodell, 1980	256
AB5	La.9Nd.05Pr.05Ni3.5Co.65Al.3Mn.4	1.3		50	0.2	Willey, 1999	1192			sloping plateau
AB5	La0.13Ce0.35Pr0.52Co5	0.8	40	50	3.6	Sarynin, 1981	1526
AB5	La0.1Ce0.9Co5	0.6	41	20	0.84	Burnasheva, 1978	1518
AB5	La0.2Ce0.8Co5	0.6	44	20	0.72	Burnasheva, 1978	1518
AB5	La0.2Pr0.8Co5 (M)	0.7	38	20	0.23	Burnasheva, 1978	1517			Lower plateau
AB5	La0.3Mm0.7Ni4.5Cu0.3Al0.2	1.4	31.4	22	4.4	Petrova, 1989	1520
AB5	La0.4Ce0.6Co5	0.6	38	20	0.65	Burnasheva, 1978	1518
AB5	La0.4Pr0.6Co5 (M)	0.9	29	20	17	Burnasheva, 1978	1517			Upper plateau
AB5	La0.5Ce0.5Ni5	1.3		25	10	Joubert, 2000	1512
AB5	La0.65Ce0.28Pr0.07Co5	1	47	50	1.1	Sarynin, 1981	1526
AB5	La0.66Ce0.2Pr0.14Co5	1	41	50	0.9	Sarynin, 1981	1526
AB5	La0.6Pr0.4Co5 (M)	0.9	43	20	0.17	Burnasheva, 1978	1517			Lower plateau
AB5	La0.75Ce0.25Ni4Cu0.8Al0.2	1.4	33.5	22	0.7	Petrova, 1989	1520
AB5	La0.75Ce0.25Ni4Cu0.9Al0.1	1.4	32.9	22	1	Petrova, 1989	1520
AB5	La0.75Ce0.25Ni4Cu0.9Ti0.1	1.4	38.4	22	1.1	Petrova, 1989	1520
AB5	La0.75Pr0.25Ni4.5Cu0.3Al0.2	1.4	34.2	22	0.8	Petrova, 1989	1520
AB5	La0.7Ce0.3Co5 (M)	0.7	42	20	0.17	Burnasheva, 1978	1518			Lower plateau
AB5	La0.8Ce0.2Co5	0.8	34	20	0.18	Burnasheva, 1978	1518
AB5	La0.8Pr0.2Co5 (M)	0.9	38	20	0.11	Burnasheva, 1978	1517			Lower plateau
AB5	La1.02Ni4.75Sn0.25	1.2		27	0.38	Bowman, 2002	1513
AB5	La1-xCexB5	0.14		30	2017-01-10	Adzic, 1995	264	(B5 = Ni3.55Co.75Mn.4Al.3)
AB5	La1-xCexNi5			21	2017-03-14	van Vucht, 1970	93	(x = 0-0.6)
AB5	La1-xCexNi5	1.4		25	1.7 - 10	Corre, 1998	1185	x=0-0.3
AB5	La1-xNdxNi5	1.1		20	2017-02-15	Uchida, 1982	131	(x = 0-1)
AB5	La1-xPrxNi5	1.3		20	2017-02-20	Uchida, 1982	131	(x = 0-1)
AB5	La1-xSmxNi5	1.2		20	2017-02-10	Uchida, 1982	131	(x = 0-0.5)
AB5	La1-xTbxNi5			40	2017-03-30	Achard, 1977	271
AB5	La1-xYxNi5	1		24	2017-08-23	Mendelsohn, 1977	506	(x=0.3-0.5)
AB5	LaCo4.95Mn.05 (M)	1.6		21	0.05	Klyamkin, 1993	587
AB5	LaCo5	0.8	42.4			Shilov, 1983	531
AB5	LaCo5	1		105	1	Shilov, 1981	530
AB5	LaCo5	1.1				Guidotti, 1977	105
AB5	LaCo5 (M)	0.99	40	50	0.2	Kuijpers, 1972	96
AB5	LaCo5 (M)	1	42.3	30	0.06	Ishikawa, 2002	1510
AB5	LaCo5 (M)	1.1		40	0.08	Patrikeev, 1984	505
AB5	LaCo5 (M)	1.9		21	0.05	Lakner, 1976	166
AB5	LaCu5	0.55		78	2	Shinar, 1978	131
AB5	LaCu5	0.7		25	0.3	Takeshita, 1980	503
AB5	LaCu5	0.8	42.7	101	5	Spada, 1987	255
AB5	LaFe5	0.6		100	1	Reilly, 1972	195
AB5	LaNi2.5Co2.5	1		20	0.14	Sakai, 1990	570
AB5	LaNi2.5Co2.5 (M)	1.2		30	0.1	Uchida, 1995	413
AB5	LaNi2Cu3	0.9	32	35	1.1	Ganich, 1999	1523
AB5	LaNi2FeCu2	1.1	36.9	22	0.55	Burnasheva, 1984	1528
AB5	LaNi3.55Co.75Mn.4Al.3			25	0.02	Percheron, 1994	269
AB5	LaNi3.55Mn.4Al.3Co.75	1.3		25	0.2	Joubert, 1998	1186
AB5	LaNi3.55Mn0.4Al0.3Co0.75			40	0.038	Joubert, 2000	1512
AB5	LaNi3.55Mn0.4Al0.3Co0.75			25	0.02	Latroche, 1998	813
AB5	LaNi3.5Mn1.5	1.1		100	0.3	Bagchi, 1997	1167
AB5	LaNi3.85Mn0.4Co0.75			40	0.24	Joubert, 2000	1512
AB5	LaNi3.85-yCo.75Mn.4Al.y	1.2				Reilly, 1999	1232	y=0-0.2
AB5	LaNi3.92Al.98	1.1	42	250	5	Ivanova, 1997	639
AB5	LaNi3.94Mn0.4Al0.3Co0.36			40	0.047	Joubert, 2000	1512
AB5	LaNi3.95Al0.3Co0.75	1.4		40	0.3	Joubert, 2000	1512
AB5	LaNi3.95-yCo.75MnyAl.3	1.1				Reilly, 1999	1232	y=0-0.4
AB5	LaNi3AlCu	1		60	0.2	Burnasheva, 1984	1528			Sloping plateau
AB5	LaNi3Co2			40	0.5	Joubert, 2000	1512
AB5	LaNi3Co2	1.5		25	0.23	Goodell, 1980	256
AB5	LaNi3Cr0.5Cu1.5	1.1	35.5	22	0.62	Burnasheva, 1984	1528
AB5	LaNi3Cu2	1.1	33	35	1.8	Ganich, 1999	1523
AB5	LaNi4Mn			40	0.009	Joubert, 2000	1512
AB5	LaNi4Mn	1.2		20	0.02	Sakai, 1990	570
AB5	LaNi5			22	2	Kisi, 1994	675
AB5	LaNi5	1.4	29.1	20	1.7	Zhang, 1989	262	(Chemically recovered)
AB5	LaNi5	1.4	29.5	21	1.5	Shilov, 1988	672
AB5	LaNi5	1.4		50	4.5	Nakamura, 2000	1207
AB5	LaNi5		37.7	0	0.4	Mikheeva, 1976	668
AB5	LaNi5	1.4	29.7	0	0.5	Mikheeva, 1976	668
AB5	LaNi5	1.5		25	1.7	Goodell, 1980	256
AB5	LaNi5	1.5	31.8	15	1	Murray, 1981	261
AB5	LaNi5	1.5		23	1.7	Bowman, 1997	642	Gas atomized
AB5	LaNi5	1.5	30.2	25	1.7	Luo, 1998	815
AB5	LaNi5	1.5		40	3.35	Joubert, 2000	1512
AB5	LaNi5	1.5	30.8	25	1.8	Lundin, 1975	260
AB5	LaNi5	1.5		50	4	Oesterreicher, 1976	524
AB5	LaNi5	1.5		-78	0.007	Andreev, 1984	508
AB5	LaNi5	1.5	28.5	-55	0.06	Andreev, 1978	670	Low temperature data
AB5	LaNi5	1.5	30.1	21	2.4	van Vucht, 1970	93
AB5	LaNi5	1.8	30.1	-40	0.1	Semenenko, 1977	504
AB5	LaNi5	1.8				Verbetsky, 1984	1150		70 atm @ -140C
AB5	LaNi5 (M)	1.9		21	2.2	Lakner, 1980	165
AB5	LaNi5.2Mn0.05Al0.05	0.8	26.8	20	1.3	Verbetsky, 1989	1529
AB5	LaNi5.5Mn0.1Al0.05	1	26	20	1.6	Verbetsky, 1989	1529
AB5	LaNi5.63	1.3		25	2.4	Goodell, 1980	256
AB5	LaNi5-yAly		30 - 61	25	2	Mendelsohn, 1977	108	(x=0-1.5)
AB5	LaNi5-yAly	1	33 - 48	40	0.02 - 2	Diaz, 1979	270	(y = 0.1-1.0)
AB5	LaNi5-yAly	1.1	29.2 - 37.5	50	0.5 - 6	Kodama, 1999	1189	y=0-0.5
AB5	LaNi5-yBy	0.7		40	0.08 - 2	Percheron, 1994	269	(y = 0.5-1) (B=Al, Cu, Fe, Mn, Si)
AB5	LaNi5-yCoy	1		40	0.1 - 2	vanMal, 1973	97	(y = 0.5-4.0)
AB5	LaNi5-yCoy	1.4	33 - 44	40	0.2 - 1.4	Colinet, 1987	569	(y = 1-3)
AB5	LaNi5-yCuy	0.7		25	0.3 - 2.5	Takeshita, 1980	503	(x=0-5)
AB5	LaNi5-yCuy	0.8	31 - 39	42	0.8 - 2	Shina, 1978	104	(y = 1-4)
AB5	LaNi5-yCuy	0.8		50	1.4 - 6	Reilly, 1972	195	(y = 0-4)
AB5	LaNi5-yFey	1.3	31 - 33	25	0.5 - 1.3	Lamloumi, 1987	268	(y = 0.25-1)
AB5	LaNi5-yGey	1.1	31.6 - 36	23	0.4 - 2	Witham, 1997	641	y=0.1-0.5
AB5	LaNi5-yMny	1.4	31 - 48	60	0.03 - 8	Lartigue, 1980	273	(y = 0.05-0.94)
AB5	LaNi5-yMny	1.5		25	0.09 - 2	Lundin, 1978	272	(y = 0-0.63)
AB5	LaNi5-ySny	1.2	31 - 41	100	1.3 - 13	Luo, 1995	406	(y = 0.1-0.5)
AB5	LaNi5-ySny	1.3		27	0.3 - 0.72	Bowman, 2002	1513	y=0.2-0.25
AB5	LaNi5-y-zMnySnz		40 - 52.8	100	0.04 - 1	Bowman, 1994	274	(y = 0.31-1.25, z = 0.05-.25)
AB5	LaNi5-yZny	1.3	30.6 - 36.8	20	0.1 - 1.6	Rozdzynska-Kielbik, 2000	1198	y=0-1.2
AB5	LaNi6.37Mn0.33	0.8	23.2	20	2	Verbetsky, 1989	1529
AB5	LaNiCo4	1	45	40	0.15	Colinet, 1987	569
AB5	LaNiy	1.2		40	2017-03-09	Buschow, 1972	95	(y = 4.9-5.5)
AB5	LaNiy-1Cu	0.6	26 - 30.2	27	0.8 - 7.9	Luo, 1996	677	y=5-6
AB5	LaPt5 (M)	0.36		21	1050	Takeshita, 1981	128
AB5	LmNi3.55Al.3Mn.4Co.6Mn.15	1.4		40	0.3	Yeh, 1999	1194	Lm=La-rich Mm		sloping plateau
AB5	LmNi3.55Al.3Mn.4Co.75	1.29		40	0.2	Yeh, 1999	1194	Lm=La-rich Mm		sloping plateau
AB5	LmNi3.55Al.3Mn.4Co.75Mn.05	1.49		40	0.18	Yeh, 1999	1194	Lm=La-rich Mm		sloping plateau
AB5	LmNi3.5Al.3Mn.4Co.75Mn.05	1.49		40	0.2	Yeh, 1999	1194	Lm=La-rich Mm		sloping plateau
AB5	LmNi3.6Al0.4Co0.7Mn0.3	1.3				Park, 2002	1515	Lm=La-rich Mm		No plateau
AB5	LmNi4.1Mn.6Co.2Al.1	1.3		130	6	Wanner, 1997	646	Lm=La-rich Mm
AB5	LmNi4.4Co.2Mn.2Al.2	1.3	34.1	50	2.3	Groll, 1989	266	(Lm = La-rich Mm)
AB5	LmNi4.5Co.1Mn.2Al.2	1.5		20	0.3	Isselhorst, 1995	625	(Lm = La-rich Mm)
AB5	LmNi4.85Sn.15	1.5		20	2.2	Isselhorst, 1995	625	(Lm = La-rich Mm)
AB5	M11-xCaxNi5	1.4		25	2017-03-10	Wang, 1996	232	(x = 0-0.7)
AB5	M1Ni5	1.3		30	2.8	Hong, 1995	621	(M1=La-rich Mm)
AB5	M1NiyCo.5Mn.3Al.4	1.1		30	0.06 - 0.5	Hong, 1995	621	(y=3.8-5) (M1=La-rich Mm)
AB5	MlNi3.6Co0.85Mn0.40Al0.15	1.3		45	0.1	Ma, 2002	1531	Ml-La-rich Mm
AB5	MlNi3.7Co.75Mn.5Ti.05	1.4		25	0.8	Shu, 2001	1182	Ml=La-rich Mm		sloping plateau
AB5	MlNi3.8Co.5Mn.4Al.3Liy	1.3	23 - 42.5	40	0.1 - 0.2	Wang, 2000	1199	y=0-0.1 (Ml=La-rich Mm)
AB5	MlNi3.8Co.5Mn.4Al.3Zny	1.1	20.8 - 42.5	20	0.05 - 0.2	Wang, 2001	1202	Y=0-0.077
AB5	MlNi4Co0.6Al0.4	1.3		22	0.1	Chen, 2002	1532	Ml-La-rich Mm
AB5	Mm(Ni,Al,Mn,M)5			30	0.2 - 10	Osumi, 1983	133	(M = Co, Cr, Cu, Nb,Ti,V,Zr)
AB5	Mm(Ni,B)5			30	0.1 - 11	Osumi, 1981	124	(B = Al, Co, Cr, Cu, Fe, Mn, Si, Ti, V, Zn)
AB5	Mm(Ni3.5Mn.4Al.3Co.7)y	0.6	30.6 - 48	30	0.8 - 1.4	Iwakura, 1997	810	y=0.88-1.12
AB5	Mm(Ni3.6Co.7Mn.4Al.3)y	1	19.3 - 38.6	30	0.5 - 4	Fukumoto, 1996	678	y=4.4-5.6
AB5	Mm(Ni3.8Al.2Mn.6)(y-0.4)/4.6Co.4	0.8		40	0.4 - 6	Higashiyama, 1997	645	y=5.0-5.8
AB5	Mm.5Ca.5Ni2.5Co2.5	1.1	34.7	50	9	Osumi, 1980	122
AB5	Mm.5Ca.5Ni5	1.3	27.6	30	8.2	Osumi, 1978	117	(+ Ca.1, Ca.25, Ca.75)
AB5	Mm.82Y.18Ni4.95Mn.05	1.5		25	5	Nakamura, 1995	414
AB5	Mm.8Ca.2Ni5	1.6	24.2	25	13	Sandrock, 1977	106
AB5	Mm.8Ca.2Ni5-yAly	1.05		30	0.9 - 3.5	Rodriguez, 1996	632	(y=0-0.5)
AB5	Mm.9Ti.1Ni5	1.3	31	30	16	Osumi, 1978	117	(+ Ti.25 & Ti.5)
AB5	Mm.9Y.1Ni4.9Mn.1	1.4		40	8	Imoto, 1995	601
AB5	Mm1-xCaxNi5 (M)	1.5	22 - 29	25	1.1 - 13	Sandrock, 1977	106	(x = 0.2-0.9)
AB5	Mm1-xCaxNi5-yCuy	0.7		25	0.1 - 29	Sandrock, 1978	107	(x = 0-1; y = 0-2.5)
AB5	MmB5	1.1		30	2	Adzic, 1995	264	(B5 = Ni3.55Co.75Mn.4Al.3)
AB5	MmCFNi4.8Al.2	1.33	31.4	25	2	Mendelsoh, 1979	265	(MmCF = cerium-free Mm)
AB5	MmNi5	1.46	21.1	25	23	Reilly, 1977	281
AB5	MmNi5	1.47		0	2017-08-09	Reilly, 1972	195	(Mm = various compositions)
AB5	MmNi5-yAly	0.7	35 - 37	15	0.5 - 4	Balasubramanian, 1993	588	(y = 0.4 & 0.8) (Mm=Indian [high-Fe])
AB5	MmNi5-yAly	1	31 - 44.9	50	0.1 - 1	Kodama, 1999	1189	y=0.7-1.0		sloping plateaux
AB5	MmNi5-yAly	1		25	0.1 - 3	Sandrock, 1978	113	(y = 0.5-0.9)
AB5	MmNi5-yCuy	1.1		25	2017-05-16	Sandrock, 1978	113	(y = 1-2.5)
AB5	MmNi5-yFey	0.8		25	2017-04-12	Sandrock, 1978	113	(y = 0.5-1.5)
AB5	MmNi5-yFey	1	22 - 29	20	2017-07-14	Apostolov, 1985	567	(y = 0.3-1.0)
AB5	MmNi5-yMny	1	24 - 28	15	2017-02-08	Balasubramaniam, 1993	588	(y = 0.4 & 0.8) (Mm=Indian [high-Fe])
AB5	MmNi5-yMny	1.3		25	0.3 - 9	Lundin, 1978	272	(y = 0.3-.9)
AB5	MmNi5-yMny	1.4		25	0.9 - 4	Sandrock, 1978	113	(y = 0.5-0.7)
AB5	MmNiyCo.75Mn.4Al.3	1.3	31.4 - 42.7	20	0.2 - 2	Ye, 2000	1201	y=3.05-4.05		sloping plateaux
AB5	NdCo5	0.62	42.7	22	0.7	van Mal, 1976	103
AB5	NdCo5	0.8				Gualtieri, 1978	448
AB5	NdCo5	0.9				Guidotti, 1977	105
AB5	NdCo5 (M)	0.77		30	0.1	Yamaguchi, 1982	179
AB5	NdCu5	0.66		100	1	Reilly, 1972	195
AB5	NdNi4.6Sn.4	1	26.4	20	1.4	Takaguchi, 2000	1196			sloping plateau
AB5	NdNi4.8Sn.2	1.1	25.7	20	6.5	Takaguchi, 2000	1196
AB5	NdNi4.9Sn.1	1.2	27.9	20	10	Takaguchi, 2000	1196
AB5	NdNi5	0.9	27.9	20	16	Takaguchi, 2000	1196
AB5	NdNi5	1.03	28			Gruen, 1977	162
AB5	NdNi5	1.27	21.6	20	20	Uchida, 1982	131
AB5	NdNi5	1.36	26.3	23	13	Anderso, 1973	99
AB5	NdNi5 (M)	1.33	27.8	30	18	Gruen, 1977	168
AB5	NdNi5-yAly	0.3				Bobet, 1998	814	y=1.89-2.97
AB5	NdNi5-yAly	0.8	47 - 54	20	0.24 - 0.42	Bobet, 1998	814	y=0.5-1.5
AB5	Pr.8Ce.3Cu5	0.43		100	1	Reilly, 1972	195
AB5	PrCo5	0.7	34.3	100	13.5	Clinton, 1975	102
AB5	PrCo5	0.8		21	0.04	Kuijpers, 1974	602
AB5	PrCo5	0.85				Guidotti, 1977	105
AB5	PrCo5 (M)	0.8	40	20	0.49	Burnasheva, 1978	1517			Lower plateau
AB5	PrCo5 (M)	1.1				Yamamoto, 2002	1511
AB5	PrCo5 (M)	1.4		21	0.6	Lakner, 1980	101
AB5	PrCu5	0.57		100	1	Reilly, 1972	195
AB5	PrNi2.5Cu2.5	0.8	19.3	23	25	Pourarian, 1986	254	(+ Cu1)
AB5	PrNi4.5Fe.5 (M)	1.26	20.5	23	6	Pourarian, 1986	254
AB5	PrNi5	1.58	30.5	23	8	Anderso, 1973	99
AB5	PrNi5 (M)	1.4	26.4	20	20	Uchida, 1982	131
AB5	PrNi5 (M)	1.4	29	20	10	Matsumoto, 1987	568
AB5	RNi4Al	0.8		24	1	Takeshita, 1978	112	(R = La, Ce, Pr, Nd, Sm, Gd, Tb, Dy, Ho, Er, Tm)
AB5	RNi5	1.5	25 - 28	25	2017-02-12	Liu, 1983	132	(R = various mischmetals)
AB5	SmCo5	0.54		21	2	Zijlstra, 1969	148
AB5	SmCo5	0.64	34.9	20	3.2	Kuijpers, 1971	94
AB5	SmCo5	0.7	30	25	5	Yamaguchi, 1983	156
AB5	SmNi5	0.9		23	30	Anderso, 1973	99
AB5	TbNi4.5Al.5	1.1	26.9	20	10	Sorgic, 1996	635
AB5	TbNi4Al	0.9	33.7	20	0.9	Sorgic, 1996	635
AB5	ThCo5	0.6		21	48	van Mal, 1976	103
AB5	ThFe5	0.3				Gubbens, 1984	669
AB5	ThFe5	0.5				Buschow, 1975	187
AB5	ThNi4Al	0.5		24	6	Takeshita, 1977	164	(+ ThNi3Al2)
AB5	ThNi5	0.6				Buschow, 1975	187
AB5	ThNi5	0.87				Takeshita, 1981	128
AB5	ThNi5-yAly	0.5		25	0.1 - 7	Takeshita, 1980	503	(y=1-2)
AB5	YbNi5	0.62		23	120	Anderso, 1973	99
AB5	YCo5	0.73	32.2	31	28	Takeshita, 1974	101
AB5	YCo5	0.9	28.5	0	10	Sarynin, 1977	667
AB5	YCo5	0.99		23	2017-03-08	Anderso, 1973	99
AB5	YNi4.25Al.75	1.1	24.3	21	6	Sorgic, 1998	812
AB5	YNi4.5Al.5	1.1	22.4	20	20	Sorgic, 1998	812
AB5	YNi4Al	1	40.8	60	3	Sorgic, 1998	812
AB5	YNi4Mn	1.2		21	0.38	Mendelsohn, 1978	115
AB5	YNi5	1.14		23	12	Anderso, 1973	99
AB5	YNi5 (M)	0.91		21	1000	Takeshita, 1981	128
AB5	YNi5-yAly	0.6				Sorgic, 1998	812	y=1.5-2
AB5	YNi5-yAly	1		25	0.01 - 1	Takeshita, 1980	503	(y=0.5-1.5)
Complex	AgAlH4	2.9		-50	1	Mackay, 1966	754	[AlH4]-
Complex	AgBH4	3.3		-30	1	Mackay, 1966	754	[BH4]-
Complex	Al(BH4)3	16.9				Rulon, 1951	799	[BH4]-
Complex	Al(BH4)3	16.9				Schlesinger, 1953	802	[BH4]-
Complex	Ba(BH4)2	4.8		350	1	Mackay, 1966	754	[BH4]-
Complex	Ba2MgH6	2				Kadir, 1993	748	[MgH6]
Complex	Ba2OsH6	1.3				Kritikos, 1991	745	[OsH6]4-
Complex	Ba2PtH6	1.3				Kadir, 1993	747
Complex	Ba2RuH6	1.6				Kritikos, 1991	745	[RuH6]4-
Complex	Ba3Ir2H12	1.5				Kadir, 1994	749	[IrH6]3-
Complex	BaMg2OsH8	2.1				Huang, 1997	832	[OsH6]4-
Complex	BaMg2RuH8	2.7				Huang, 1997	832	[RuH6]4-
Complex	BaMgH4	2.4				Gingl, 1997	833
Complex	BaReH9	2.7		100	1	Stetson, 1994	722	[ReH9]2-
Complex	Be(AlH4)2	11.3				Monnier, 1957	791	[AlH4]-
Complex	Be(BH4)2	20.8		123	1	Sullivan, 1980	721	[BH4]-
Complex	Be(BH4)2	20.8				Schlesinger, 1953	802	[BH4]-
Complex	Ca(AlH4)2	7.9		230	1	Sullivan, 1980	721	[AlH4]-
Complex	Ca(AlH4)2	7.9				Mackay, 1966	754	[AlH4]-
Complex	Ca(BH4)2	11.6		260	1	Sullivan, 1980	721	[BH4]-
Complex	Ca(BH4)2	11.6				Kollonitsch, 1954	796	[BH4]-
Complex	Ca2FeH6	4.3				Huang, 1991	740	[FeH6]4-
Complex	Mg2Co	4.5	76	450	16	Reiser, 2000	1463	Mg2Co not stable without H
Complex	Mg2CoH5	4.5		280	1	Zolliker, 1985	731	[CoH5]4-
Complex	Mg2Fe	5.5	77.2	450	25	Reiser, 2000	1463	Mg2Fe not stable without H
Complex	Mg2FeH6	5.2				Bogdanovic’, 2002	1462	[FeH6]4-	Measured H-content
Complex	Mg2FeH6	5.5		450	19	Didisheim, 1984	725	[FeH6]4-
Complex	Mg2FeH6	5.5				Lindberg, 1986	742	[FeH6]4-
Complex	Mg2FeH6	5.5	79.2	450	28	Reiser, 1998	1159	[FeH6]4-
Complex	Mg2FeH6	5.5		350	4.5	Huot, 1998	1445	[FeH6]4-	Theoretical H-content, sample contained MgH2
Complex	Mg2FeH6	5.5				Gennari, 2002	1460	[FeH6]4-	Theoretical H-content, sample contained MgH2
Complex	Mg2Ni	3.7	62.2	450	57	Reiser, 2000	1463
Complex	Mg2NiH4	3.6		280	1	Zolliker, 1986	733	[NiH4]4-
Complex	Mg2NiH6	3.6				Lindberg, 1986	742	[NiH4]4-
Complex	Mg2OsH6	2.5				Huang, 1991	740	[OsH6]4-
Complex	Mg2OsH6	2.5				Kritikos, 1990	743	[OsH6]4-
Complex	Mg2RuH4	2.6		400	1	Bonhomme, 1992	729
Complex	Mg2RuH6	3.9				Huang, 1991	740
Complex	Mg2RuH6	3.9				Kritikos, 1991	745	[RuH6]4-
Complex	Mg3ReH7	2.7		300	1	Huang, 1993	724	[ReH6]5-
Complex	Mg3RuH3	1.7		400	1	Bonhomme, 1992	730	[Ru2H6]12-
Complex	Mg3RuH6	3.4				Bronger, 1993	773	[RuH5]5-
Complex	Mg4IrH5	1.7		400	1	Bonhomme, 1993	739
Complex	Mg6Co2	4	89			Reiser, 2000	1463	Mg6Co2 not stable without H
Complex	Mg6Co2H11	4		480	1	Cerny, 1992	732	[CoH4]5-
Complex	Mg6Ir2H11	2				Cerny, 2002	1461	[IrH4]5-, [IrH5]4-
Complex	Mn(AlH4)2	6.9		25	1	Monnier, 1957	791	[AlH4]-
Complex	Na1.5Li1.5AlH6	3.2				Zaluski, 1999	1427		Measured H-content
Complex	Na1.7Li1.3AlH6	3.1		220	8	Zaluski, 1999	1427		Measured H-content
Complex	Na1.8Li0.6B0.6AlH6	3.2		220	10	Zaluska, 1999	1423		Measured H-content
Complex	Na2LiAlH6	2.7		211	13	Bogdanovic’, 1997	1422		Measured H-content	Ti-catalyzed
Complex	Na2LiAlH6	7		211	13	Bogdanovic', 1997	719		Stoichiometric H-content	Ti-catalyzed
Complex	Na2PdH2	1.3				Noreus, 1989	331	[PdH2]2-
Complex	Na2PdH2	1.3				Bronger, 1995	751	[PdH2]2-
Complex	Na2PdH4	2.6				Bronger, 1995	769	[PdH4]2-
Complex	Na2PtH4	1.6				Bronger, 1988	760	[PtH4]2-
Complex	Na2PtH6	2.4				Bronger, 1995	764	[PtH6]2-
Complex	Na3AlH6			118	1	Gross, 2002	1444	[AlH6]3-		0-9% Ti Catalyzed
Complex	Na3AlH6	0.8	22.7			Meisner, 2002	1440	[AlH6]3-	Measured H-contents	Ti-doped or diamond ball milled
Complex	Na3AlH6	1.9		170	9	Bogdanovic’, 2000	1431	[AlH6]3-	Measured H-content	Ti-doped
Complex	Na3AlH6	2.2		150	3	Zaluska, 2000	1430	[AlH6]3-	Measured H-content	Ball milled with C
Complex	Na3AlH6	2.7		180	15	Bogdanovic’, 1997	1422	[AlH6]3-	Measured H-content	Ti-catalyzed
Complex	Na3AlH6	2.8		220	30	Zaluski, 1999	1427	[AlH6]3-	Measured H-content
Complex	Na3AlH6	3.1		220	30	Zaluska, 1999	1423	[AlH6]3-	Measured H-content
Complex	Na3AlH6	5.9		211	33	Bogdanovic', 1997	719	[AlH6]3-	Stoichiometric H-content	Ti-catalyzed
Complex	Na3AlH6	5.9	64	210	21.4	Dymova, 1975	720	[AlH6]3-	Stoichiometric H-content
Complex	Na3AlH6	5.9	50.8	150	3.5	Tolle, 1998	1160	[AlH6]3-	Stoichiometric H-content	Ti-catalyzed
Complex	Na3AlH6	5.9				Ronnebro, 2000	1448	[AlH6]3-	Stoichiometric H-content
Complex	Na3IrH6	2.3				Bronger, 1991	774	[IrH6]3-
Complex	Na3OsH7	2.6				Bronger, 2002	1455
Complex	Na3RhH6	3.4				Bronger, 1991	774	[RhH6]3-
Complex	Na3RUH7	4				Bronger, 2002	1455
Complex	Na4RuH6	3				Kritikos, 1991	744	[RuH6]4-
Complex	NaAlH4	2.1		33	1	Gross, 2002	1444	[AlH4]-	Measured H-contents	0-9% Ti Catalyzed
Complex	NaAlH4	2.2				Sandrock, 2002	1439	[AlH4]-	Measured H-contents	0-9% Ti Catalyzed
Complex	NaAlH4	2.2				Gross, 2001	1442	[AlH4]-	Measured H-contents	0-9% Ti Catalyzed
Complex	NaAlH4	3.1				Sandrock, 2002	1435	[AlH4]-	Measured H-contents	2% Ti Catalyzed
Complex	NaAlH4	3.2				Zaluska, 2001	1434	[AlH4]-	Measured H-content	Catalyzed
Complex	NaAlH4	3				Zidan, 1999	1426	[AlH4]-	Measured H-contents	Ti- and Zr-doped
Complex	NaAlH4	4				Bogdanovic’, 2001	1433	[AlH4]-	Measured H-content	Direct synthesis from NaH and Al, Ti-doped
Complex	NaAlH4	4.2		180	135	Bogdanovic’, 1997	1422	[AlH4]-	Measured H-contents	Various dopants
Complex	NaAlH4	4.5		150	55	Zaluska, 2000	1430	[AlH4]-	Measured H-content	Ball milled with C
Complex	NaAlH4	4.7	37	150	61	Bogdanovic’, 2000	1431	[AlH4]-	Measured H-content	Ti-doped
Complex	NaAlH4	4.8				Jensen, 1999	1425	[AlH4]-	Measured H-contents	1-4% Ti-doping
Complex	NaAlH4	4.9				Zaluski, 1999	1427	[AlH4]-	Measured H-content, heated to 220C
Complex	NaAlH4	5				Jensen, 2001	1441	[AlH4]-	Measured H-contents	2% Ti doped
Complex	NaAlH4	7.5		180	135	Bogdanovic', 1997	719	[AlH4]-	Stoichiometric H-content	Ti-catalyzed
Complex	NaAlH4	7.5	12.8	210	153	Dymova, 1975	720	[AlH4]-	Stoichiometric H-content
Complex	NaAlH4	7.5	37.6			Smith, 1963	784	[AlH4]-	Stoichiometric H-content
Complex	NaAlH4	7.5		230	1	Finholt, 1955	788	[AlH4]-	Stoichiometric H-content
Complex	NaAlH4	7.5	35 - 38	150	62	Tolle, 1998	1160	[AlH4]-	Stoichiometric H-content	Ti-catalyzed
Complex	NaBH4	10.7				Sullivan, 1980	721
Complex	NaBH4	10.7	90			Smith, 1963	784	[BH4]-
Complex	NaBH4	10.7				Abrahams, 1954	804	[BH4]-
Complex	NaBH4	10.7		400	1	Schleshinger, 1953	805	[BH4]-
Complex	NaMgH3	6				Ronnebro, 2000	1448
Complex	NaPd3H2	0.6				Kadir, 1993	746	[PdH2]
Complex	R(BH4)3	5.5		200	1	Zange, 1960	798	[BH4]-	R = Y, Sm, Eu,Gd,Tb, Dy, Ho, Er, Tm, Yb, Eu)
Complex	Rb2CaH4	1.9				Bertheville, 2001	1452
Complex	Rb2PdH4	2.1				Bronger, 1992	768	[PdH4]2-
Complex	Rb2PtH4	1.1				Bronger, 1988	760	[PtH4]2-
Complex	Rb2PtH6	1.6				Bronger, 1995	762	[PtH6]2-
Complex	Rb2ZnH4	1.7		360	1	Bortz, 1997	831
Complex	Rb3MnH5	1.6				Bronger, 1997	834
Complex	Rb3OsH9	2				Bronger, 2002	1455
Complex	Rb3PdH5	1.4				Bronger, 1992	767	[PdH4]2-
Complex	Rb3PtH5	1.1				Bronger, 1988	761	[PtH4]2-
Complex	Rb3ZnH5	1.5		360	1	Bortz, 1997	741	[ZnH4]2-
Complex	RbBH4	4				Abrahams, 1954	804	[BH4]-
Complex	RbMgH3	2.7				Gingl, 1999	1446
Complex	Sn(AlH4)4	6.6		-40	1	Mackay, 1966	754	[AlH4]-
Complex	Sn(BH4)2	5.4		-65	1	Amberger, 1963	795	[BH4]-
Complex	Sr(BH4)2	6.9		350	1	Mackay, 1966	754	[BH4]-
Complex	Sr1-xBaxAl2	0.9				Zhang, 2002	1459	x=0-0.5	Multiple hydride phases
Complex	Sr2FeH6	2.6				Huang, 1991	740	[FeH6]4-
Complex	Sr2IrH4	1.1				Moyer, 1969	775
Complex	Sr2IrH5	1.4		335	1	Moyer, 1971	776
Complex	Sr2Mg3H10	3.9				Gingl, 1994	750
Complex	Sr2MgH6	2.9				Bertheville, 1999	1447
Complex	Sr2OsH6	1.6				Kritikos, 1991	745	[OsH6]4-
Complex	Sr2PtH6	1.6				Kadir, 1993	747	[PtH4]2-
Complex	Sr2RhH5	1.8				Bronger, 1994	772
Complex	Sr2RhH5	1.8		325	1	Moyer, 1971	776
Complex	Sr2RuH6	2.1		450	1	Moyer, 1971	776
Complex	Sr2RuH6	2.1				Hagemann, 2002	1454	[RuH6]4-
Complex	Sr2-xEuxIrH5	1				Moyer, 1996	782	(x=0-2)
Complex	Sr2-xEuxRuH5	1.2				Moyer, 1996	782	(x=0-2)
Complex	Sr2-xEuxRuH6	1.5				Lindsay, 1993	781	(x=0-2)
Complex	Sr8Rh5H23	1.9				Bronger, 1994	772	[RhH6]
Complex	SrAl2H2	1.4				Gingl, 2000	1449
Complex	SrMg2FeH8	4		440	1	Huang, 1992	727	[FeH6]4-
Complex	SrPdH2.7	1.4				Bronger, 1994	771
Complex	Th(BH4)4	5.5		204	1	Hoekstra, 1949	800	[BH4]-
Complex	Ti(AlH4)4	9.4		-85	1	Mackay, 1966	754	[AlH4]-
Complex	Ti(BH4)3	13.1				Hoekstra, 1949	800	[BH4]-
Complex	Tl(AlH4)3	4.1		25	1	Mackay, 1966	754	[AlH4]-
Complex	TlBH4	1.8				Waddington, 1958	797	[BH4]-
Complex	U(BH4)4	5.4		100	1	Sullivan, 1980	721	[BH4]-
Complex	U(BH4)4	5.4		150	1	Schleshinger, 1953	807	[BH4]-
Complex	Yb2RuH6	1.3				Lindsay, 1976	779
Complex	Yb4Mg4Fe3H22	2.3	137	458	4	Huang, 1993	738	[FeH6]4-
Complex	Zn(BH4)2	8.5		50	1	Sullivan, 1980	721	[BH4]-
Complex	Zn(BH4)2	8.5		120	1	Mackay, 1966	754	[BH4]-
Complex	Zr(AlH4)4	7.5		25	1	Reid, 1957	793	[AlH4]-
Complex	Zr(BH4)4	10.7				Sullivan, 1980	721
Complex	Zr(BH4)4	10.7				Mackay, 1966	754	[BH4]-
Complex	Ca2IrH5	1.8				Moyer, 1971	776
Complex	Ca2OsH6	2.2				Huang, 1991	740	[OsH6]4-
Complex	Ca2OsH6	3.2				Kritikos, 1991	745	[OsH6]4-
Complex	Ca2RhH5	2.7		360	1	Moyer, 1971	776
Complex	Ca2RuH6	3.2				Hagemann, 2002	1454	[RuH6]4-
Complex	Ca2RuH6	3.2				Moyer, 1971	776
Complex	Ca2-xEuxIrH5	1				Moyer, 1996	782	(x=0-2)
Complex	Ca2-xEuxRuH6	1.5				Moyer, 1989	780	(x=0-2)
Complex	Ca4Mg4Fe3H22	5		395	1	Huang, 1992	726	[FeH6]4-
Complex	Ca4Mg4Fe3H22	5	122	441	4	Huang, 1993	738	[FeH6]4-
Complex	CaAg2H	0.4				Mendelsohn, 1975	778
Complex	CaMgNiH4	3.2		405	1	Huang, 1992	734	[NiH4]4-
Complex	CaPdH2	1.4				Bronger, 1990	766	[PdH2]2-
Complex	Cd(BH4)2	5.7		80	1	Mackay, 1966	754	[BH4]-
Complex	Ce(AlH4)3	5.2		25	1	Mackay, 1966	754	[AlH4]-
Complex	Co(BH4)2	9.1				Monnier, 1957	791	[BH4]-
Complex	Cs2MgH4	1.4				Bertheville, 2002	1453
Complex	Cs2PdH4	1.1				Bronger, 1992	768	[PdH4]2-
Complex	Cs2PtH4	0.9				Bronger, 1988	760	[PtH4]2-
Complex	Cs2PtH6	1.3				Bronger, 1995	762	[PtH6]2-
Complex	Cs2ZnH4	1.2		360	1	Bortz, 1997	831
Complex	Cs3MnH5	1.1				Bronger, 1997	834
Complex	Cs3OsH9	1.5				Bronger, 2002	1455
Complex	Cs3PdH5	1				Bronger, 1992	767	[PdH4]2-
Complex	Cs3PtH5	0.8				Bronger, 1988	761	[PtH4]2-
Complex	Cs3ZnH5	1.1		355	1	Bortz, 1997	741	[ZnH4]2-
Complex	Cs4Mg3H10	1.6				Bertheville, 2002	1453
Complex	CsAlH4	2.5	77			Smith, 1963	784	[AlH4]-
Complex	CsBH4	2.7				Abrahams, 1954	804	[BH4]-
Complex	CsCaH3	1.7				Gingl, 1999	1446
Complex	CsMgH3	1.9				Bertheville, 2002	1453
Complex	CuAlH4	4.3		-70	1	Mackay, 1966	754	[AlH4]-
Complex	CuBH4	5.1		-12	1	Klingen, 1964	801	[BH4]-
Complex	Eu2FeH6	1.7				Huang, 1991	740	[FeH6]4-
Complex	Eu2IrH5	1				Moyer, 1980	457
Complex	Eu2Mg3H10	2.6				Kohlmann, 2001	1451
Complex	Eu2MgH6	1.8				Kohlmann, 2001	1451
Complex	Eu2RuH6	1.5		900	1	Thompson, 1975	777
Complex	Eu2RuH6	1.5				Hagemann, 2002	1454	[RuH6]4-
Complex	Eu6Mg7H26	2.4				Kohlmann, 2001	1451
Complex	Fe(AlH4)2	6.8		25	1	Schaeffer, 1956	792	[AlH4]-
Complex	Fe(BH4)2	9.4		-10	1	Schaeffer, 1956	792	[BH4]-
Complex	Ga(AlH4)3	7.4		35	1	Mackay, 1966	754	[AlH4]-
Complex	Hf(BH4)4	6.8				Hoekstra, 1949	800	[BH4]-
Complex	In(AlH4)3	5.8		-40	1	Mackay, 1966	754	[AlH4]-
Complex	K2MgH4	3.8				Bertheville, 2001	1452
Complex	K2PdH4	2.1				Bronger, 1995	751	[PdH2]2-
Complex	K2PtH4	1.5				Bronger, 1986	759	[PtH4]2-
Complex	K2PtH6	2.2				Bronger, 1995	751	[PtH6]4-
Complex	K2ZnH4	2.7		310	1	Bortz, 1994	736	[ZnH4]2-
Complex	K3MnH5	2.8				Bronger, 1997	834
Complex	K3PdH3	1.3				Bronger, 1990	765	[PdH2]2-
Complex	K3PdH5	2.1				Bronger, 1992	767	[PdH2]2-
Complex	K3PtH5	1.6				Bronger, 1988	761	[PtH4]2-
Complex	K3ZnH5	2.7		360	1	Bortz, 1994	737	[ZnH4]2-
Complex	KAlH4	5.7	72.6			Smith, 1963	784	[AlH4]
Complex	KBH4	7.5				Sullivan, 1980	721	[BH4]-
Complex	KBH4	7.5	69			Smith, 1963	784	[BH4]-
Complex	KBH4	7.5				Abrahams, 1954	804	[BH4]-
Complex	KBH4	7.5		190	1	Schleshinger, 1953	805	[BH4]-
Complex	KNaReH9	3.5		100	1	Stetson, 1995	723	[ReH9]2-
Complex	Li1.8Na1.2AlH6	3.3		220	3	Zaluska, 1999	1423		Measured H-content
Complex	Li2BeH4	6		300	2	Zaluska, 2000	1450		Measured H-content
Complex	Li2PdH2	0.9				Bronger, 1995	751	[PdH2]2-
Complex	Li3AlH6	2.1				Balema, 2000	1428	[AlH6]3-	Measured H-content	Ti-catalyzed
Complex	Li3Be2H5	8.1	40	300	2	Zaluska, 2000	1450		Measured H-content
Complex	Li3Be2H7	8.1		250	1	Zaluska, 2001	1434		Measured H-content
Complex	Li3IrH6	2.8				Bronger, 1991	774	[IrH6]3-
Complex	Li3RhH4	3.2				Bronger, 1991	770	[RhH4]3-
Complex	Li3RhH6	4.7				Bronger, 1995	751	[RhH6]3-
Complex	Li4OsH6	2.7				Kritikos, 1991	744	[OsH6]4-
Complex	Li4RuH6	4.5				Kritikos, 1991	744	[RuH6]4-
Complex	LiAlH4	7				Zaluski, 1999	1427	[AlH4]-	Measured H-content, heated to 200C
Complex	LiAlH4	10.6		190	1	Sullivan, 1980	721	[AlH4]-
Complex	LiAlH4	10.6	61	200	1	Block, 1965	783	[AlH4]-
Complex	LiAlH4	10.6	18.9			Smith, 1963	784	[AlH4]
Complex	LiAlH4	10.6				Wiberg, 1951	785	[AlH4]-	Catalyzed by Ti, Si, Fe, Cu, Al, B
Complex	LiBeH3	5.1		300	2	Zaluska, 2000	1450		Measured H-content
Complex	LiBH4	18.5				Sullivan, 1980	721	[BH4]-
Complex	LiBH4	18.5	69			Smith, 1963	784	[BH4]-
Complex	LiBH4	18.5				Schleshinger, 1953	805	[BH4]-
Complex	LiMg2RuH7	4.3		400	1	Huang, 1994	728	[RuH6]4-
Complex	LiSr2PdH5	1.7		400	1	Yoshida, 1993	735	[PdH3]3-
Complex	Mg(AlH4)2	9.3		140	1	Sullivan, 1980	721	[AlH4]-
Complex	Mg(AlH4)2	9.3		140	1	Mackay, 1966	754	[AlH4]-
Complex	Mg(AlH4)2	9.3				Wiberg, 1950	786	[AlH4]-
Complex	Mg(BH4)2	14.9		320	1	Sullivan, 1980	721	[BH4]-
Complex	Mg(BH4)2	14.9		140	1	Wiberg, 1952	787	[BH4]-
Mg	Mg51Zn20	3.6	80.9	330	8	Bruzzone, 1983	431
Mg	Mg-5Ag	5.3				Douglass, 1978	89
Mg	Mg5Al4	5.4		326	7	Reilly, 1976	490
Mg	Mg-5Al-5Y	5				Douglass, 1978	89
Mg	Mg-5Bi	2				Douglass, 1978	89
Mg	Mg-5Ca	4.9				Douglass, 1978	89
Mg	Mg-5Co	2				Douglass, 1978	89
Mg	Mg-5Co	5.3				Ivanov, 1987	708	(Mechanical alloy)
Mg	Mg-5Cu	4				Guinet, 1978	701
Mg	Mg-5Fe	5.2				Ivanov, 1987	708	(Mechanical alloy)
Mg	Mg-5Mn	6				Douglass, 1978	89
Mg	Mg-5Nb	5.3				Ivanov, 1987	708	(Mechanical alloy)
Mg	Mg-5Ni	5.9	102	300	1.4	Hong, 2002	1494		Rotation-cylinder synthesis method
Mg	Mg-5Ni	5.3				Ivanov, 1987	708	(Mechanical alloy)
Mg	Mg-5Ni	7.4	76.4	323	2.9	Friedlmeier, 1997	714
Mg	Mg-5Ni-5Y	5.2				Douglass, 1978	89
Mg	Mg-5Sb	2.4				Douglass, 1978	89
Mg	Mg-5Si	3.5				Douglass, 1978	89
Mg	Mg-5Sn	5				Douglass, 1978	89
Mg	Mg-5Ti	4.4				Ivanov, 1987	708	(Mechanical alloy)
Mg	Mg-5Ti-10V-10Fe	6.2				Khrussanova, 2001	1490		Ball milled
Mg	Mg-5Tm	4.8		300	1.3	Liang, 1999	1478	Tm=Ti, V, Mn, Fe, Ni	Ball milled composites
Mg	Mg-5V	5.6		300	1.3	Dehouche, 2000	1483		Ball milled composite
Mg	Mg-5V	5.8	62	310	1.5	Liang, 1999	1474		Ball milled composite
Mg	Mg-5Y	7				Douglass, 1978	89
Mg	Mg6Al7Cu	0.8				Reilly, 1974	491
Mg	Mg6Co2	4	89			Reiser, 2000	1463	Mg6Co2 not stable without H
Mg	Mg6Pd	0.8				Reilly, 1974	491
Mg	Mg6Pd	0.9	80.3	160	0.014	Kume, 1987	576
Mg	Mg-78Mg2Ni (M)	4.8	63 - 79	302	4	Buchner, 1978	699
Mg	Mg7Zn3	0.9				Reilly, 1974	491
Mg	Mg7Zn3	2.5		315	2.5	Akiba, 1991	709
Mg	Mg9Ce	4		349	5	Reilly, 1974	491
Mg	Mg9Mm	4.8		310	2.2	Reilly, 1976	490
Mg	MgAl	3		352	23	Reilly, 1974	491	(Beta + Gamma phases)
Mg	MgAl.89Mn.19	5		350	9	Reilly, 1976	490
Mg	Mg-Ca-Al	4.5				Verbetsky, 1988	1497
Mg	Mg-Ca-Ce	3.3				Verbetsky, 1988	1497
Mg	Mg-Ca-Cu	3.3				Verbetsky, 1988	1497
Mg	Mg-Ca-Ni	3.5				Verbetsky, 1988	1497
Mg	Mg-Ca-Zn	2.3				Verbetsky, 1988	1497
Mg	MgCu.3Zr.21	2.7				Reilly, 1974	491
Mg	MgLa	1.8				Beck, 1962	45
Mg	MgLa	2.6		290	0.8	Semenenko, 1981	1498
Mg	MgMn.35Ni.35 (M)	3.3		349	6.5	Reilly, 1976	490
Mg	MgNi	1.6		140	0.7	Han, 1999	1470	Amorphous		Sloping plateau
Mg	MgNi	1.75		140	3	Jiang, 2000	1464	Amorphous		Sloping plateau
Mg	MgNi	2	40	25	0.004	Ikeda, 1998	1466	Amorphous
Mg	MgNi.5Mn.5	3.5				Reilly, 1974	491
Mg	MgNi0.5Co0.5	1.8	26			Ikeda, 1998	1466	Amorphous		No plateau
Mg	MgNi0.5Cu0.5	1.2	8			Ikeda, 1998	1466	Amorphous		No plateau
Mg	MgNi0.86Co0.03	2.1		300	0.8	Tsushio, 1998	1467	Amorphous
Mg	MgNi0.86Cr0.03	0.9	50			Tsushio, 1998	1467	Amorphous		No plateau
Mg	MgNi0.86Fe0.03	1.3				Tsushio, 1998	1467	Amorphous		No plateau
Mg	MgNi0.86Mn0.03	2.1		300	1	Tsushio, 1998	1467	Amorphous
Mg	MgNi0.8Co0.2	2				Ikeda, 1998	1466	Amorphous
Mg	MgNi0.8Cu0.2	1.8				Ikeda, 1998	1466	Amorphous
Mg	MgTi.29Cu.39	2.8				Reilly, 1974	491
Mg	MgTi.38Ni.12	2.1				Reilly, 1974	491
Mg	MgTi.39Cu.29 (M)	3.8		350	7	Reilly, 1976	490
Mg	MgTi.39Mn.23	1.7				Reilly, 1974	491
Mg	Mg-xCr2O3	6.8				Oelerich, 2001	1487	x=0.2-5 at.%	Ball milled
Mg	Mg-xNd	5.4				Verbetsky, 1988	1497	x=21-33 wt.%
Mg	Mg-xPr	5.2				Verbetsky, 1988	1497	x=21-33 wt.%
Mg	MgZn.29Ti.11	2.1				Reilly, 1974	491
Mg	47.4Mg-30.3Mm-22.3Ni	4.2				Kuliev, 1988	1504
Mg	49.8Mg-19.3Mm-30.9Ni	4.2				Kuliev, 1988	1504
Mg	50Mg-11.6Y-38.4Ni	4.1				Semenenko, 1984	1505
Mg	50Mg-16.2Ce-33.8Ni	4.2				Semenenko, 1984	1505
Mg	50Mg-6.6Sc-43.4Ni	4.4				Semenenko, 1984	1505
Mg	54.3Mg-23.5Mm-22.2Ni (M)	4		350	7	Kuliev, 1988	1504
Mg	55.3Mg-10.3Mm-34.4Ni	4.4				Kuliev, 1988	1504
Mg	57.6Mg-25.2Mm-17.2Ni	4.8				Kuliev, 1988	1504
Mg	58.1Mg-24.2Mm-17.7Ni	4.9				Kuliev, 1988	1504
Mg	62.1Mg-28.8Mm-9.1Ni	5.3				Kuliev, 1988	1504
Mg	65.2Mg-31.5Mm-3.3Ni	5.5				Kuliev, 1988	1504
Mg	66.0Mg-7.5Mm-26.5Ni	5.4				Kuliev, 1988	1504
Mg	6Mg0.666Ca0.060Cu0.274	2.9				Verbetsky, 1984	1501
Mg	73Mg-18Ca-9Al	4.8				Semenenko, 1983	1500
Mg	73Mg-27Nd	5.7				Semenenko, 1985	1506
Mg	73Mg-27Pr	5.2				Semenenko, 1985	1506
Mg	75Mg-3.0Ca-22.0Ni	6.1				Semenenko, 1984	1505
Mg	75Mg-3.3Sc-21.7Ni	6				Semenenko, 1984	1505
Mg	75Mg-5.8Y-19.2Ni	6				Semenenko, 1984	1505
Mg	75Mg-6.0Ca-44.0Ni	4.2				Semenenko, 1984	1505
Mg	75Mg-8.1Ce-16.9Ni	6				Semenenko, 1984	1505
Mg	79Mg-21Nd	5.9				Semenenko, 1985	1506
Mg	79Mg-21Pr	5.5				Semenenko, 1985	1506
Mg	90.4Mg-1.6Ca-8.0Al	6.4				Semenenko, 1983	1500
Mg	91.2Mg-0.8Ca-8.0Al	6.8				Semenenko, 1983	1500
Mg	95.4Mg-1.6Ca-3.0Al	5.1				Semenenko, 1983	1500
Mg	96.2Mg-0.8Ca-3.0Al	3.4				Semenenko, 1983	1500
Mg	Ca19Mg8	5.4				Bertheville, 1999	1473
Mg	CeMg12	5.9				Ivanov, 1983	1496
Mg	CeMg2	3.1	101	216	0.1	Verbetsky, 1989	1155
Mg	LaMg2	3.1				Verbetsky, 1987	1503
Mg	LnMg2	3.1	101			Verbetsky, 1988	1497	Ln=Ce, La, Er, Yb)
Mg	Mg.335Al.622La.044	1.7		350	14.5	Nachman, 1982	700
Mg	Mg.345Al.609La.044	2.1		350	13.5	Nachman, 1982	700
Mg	Mg.364Al.591La.046	2.3		350	12	Nachman, 1982	700
Mg	Mg.56Al.34La.05Y.05	3.1		310	2	Nachman, 1982	700
Mg	Mg.56Al.34La.1	2.1		310	1.7	Nachman, 1982	700
Mg	Mg.56Al.34Mm.1	2.2		310	1.8	Nachman, 1982	700
Mg	Mg.56Al.34Ni.05Y.05	2.6		310	1.5	Nachman, 1982	700
Mg	Mg.56Al.34Y.1	3.3		310	2.3	Nachman, 1982	700
Mg	Mg1.75Ti.25Ni.75Cu.25	2		300	2.3	Yuan, 1999	1229
Mg	Mg1.7NiAl.3 (M)	2.7	76.2	312	4.5	Biris, 1982	758
Mg	Mg1.92NiAl.08	3.5	70.5	295	4	Hirata, 1983	427
Mg	Mg1.9Al.1Ni			250	1	Tsushio, 1998	830
Mg	Mg1.9Al.1Ni.8Co.2			250	0.42	Tsushio, 1998	830
Mg	Mg1.9Al.1Ni.8Cu.2			250	1.7	Tsushio, 1998	830
Mg	Mg1.9Al.1Ni.8Mn.2			250	0.95	Tsushio, 1998	830
Mg	Mg1.9B.1Ni			250	0.9	Tsushio, 1998	830
Mg	Mg1.9Ca.1Ni.8Cu.2			250	1.4	Tsushio, 1998	830
Mg	Mg1.9Si.1Ni			250	1	Tsushio, 1998	830
Mg	Mg1.9Ti.1Ni	2.9	62.5	300	2.5	Liang, 1999	1226	Nanocrystalline
Mg	Mg1.9Ti0.1Ni0.9Mn0.1	3.1		250	0.8	Yuan, 2001	1489
Mg	Mg-10 Al2O3	5.6				Song, 2002	1495		H2 ball milling
Mg	Mg-10 CeO2	3.4				Song, 2002	1495		H2 ball milling
Mg	Mg-10 Cr2O3	5.8				Song, 2002	1495		H2 ball milling
Mg	Mg10.5Ba	5.1				Reilly, 1974	491
Mg	Mg10.8Ba (M)	4.9		375	12	Reilly, 1976	490
Mg	Mg-10Al	6.5				Douglass, 1974	192
Mg	Mg-10LaNi5	4.5				Khrussanova, 2000	1484		Ball milled composite
Mg	Mg-10Ni	4.7				Song, 1999	1468	Ball Milled
Mg	Mg-10Ni	6.2	90	300	2	Hong, 2002	1494		Rotation-cylinder synthesis method
Mg	Mg-10Ni	3.6	78	335	9	Boulet, 1983	704
Mg	Mg-10Ni (M)		78.2	303	2	Akiba, 1982	91
Mg	Mg-10Ni (M)	7.2	77.4	292	1.3	Friedmmeier, 1988	713
Mg	Mg-10YNi2Al3	5.7				Khrussanova, 2000	1484		Ball milled composite
Mg	Mg-10YNi4Al	5.6				Khrussanova, 2000	1484		Ball milled composite
Mg	Mg11CeCo	4.3				Pezat, 1980	703
Mg	Mg11CeCr	4.3				Pezat, 1980	703
Mg	Mg11CeFe	4				Pezat, 1980	703
Mg	Mg11CeMn	4.1				Pezat, 1980	703
Mg	Mg11CeNi	4.5				Pezat, 1980	703
Mg	Mg11CeV	3.9				Pezat, 1980	703
Mg	Mg11CeZn	4.2				Pezat, 1980	703
Mg	Mg12Ce	3.8	65	341	9	Boulet, 1983	704
Mg	Mg12Ce	4.6				Pezat, 1980	703
Mg	Mg12Ce	6		325	3	Darriet, 1984	540
Mg	Mg12La	3.4		400	0.8	Pal, 1997	710
Mg	Mg12Ln	5.9		325	3	Darriet, 1980	433	(Ln = Ce, La, Mm)
Mg	Mg12Mm	4.6	82	350	7	Shaltiel, 1984	706
Mg	Mg12Nd	5.4				Semenenko, 1985	1506
Mg	Mg12Pr	5.3				Semenenko, 1985	1506
Mg	Mg-14Al	6.7		352	6	Reilly, 1976	490
Mg	Mg14Al12Ti3 (M)	3.8	73	337	4.2	Lupu, 1982	757
Mg	Mg16La1.6Ca.4Ni	3.4				Khrussanova, 1987	707
Mg	Mg16La1.8Ca.2Ni	3.2				Khrussanova, 1987	707
Mg	Mg16La2Ni	3.9				Khrussanova, 1982	702
Mg	Mg17Al10Ti2 (M)	4.1		304	2	Lupu, 1982	757
Mg	Mg17Al11Ti (M)	4.7		304	2.2	Lupu, 1982	757
Mg	Mg17Al12	3.3				Reilly, 1974	491	(Gamma phase)
Mg	Mg17Al12	4.4	70			Semenenko, 1983	1499
Mg	Mg17Al9Ti3 (M)	4.6		337	4.2	Lupu, 1982	757
Mg	Mg17Ba2 (M)	3.9		352	7	Reilly, 1974	491
Mg	Mg17Ce2	5.1				Semenenko, 1984	1502
Mg	Mg17La1.6Ca.4	3.9				Khrussanova, 1985	436
Mg	Mg17La1.8Ca.2	3.3				Khrussanova, 1985	436
Mg	Mg17La2	1.7		265	1	Slattery, 1995	433
Mg	Mg17La2	1.7		100	4	Yajima, 1977	188
Mg	Mg17La2	4.5				Khrussanova, 1985	436
Mg	Mg17La2	4.9		290	0.8	Semenenko, 1981	1498			Sloping plateau
Mg	Mg17La2	5.5				Darriet, 1980	433
Mg	Mg17La2	6.05		25	2017-02-18	Dutta, 1990	442
Mg	Mg-1Ag	5.7				Douglass, 1978	89
Mg	Mg-1Ag-1Al	6				Douglass, 1978	89
Mg	Mg-1Ag-1Y	6.3				Douglass, 1978	89
Mg	Mg-1Al	6.1				Douglass, 1978	89
Mg	Mg-1Cd	5				Douglass, 1978	89
Mg	Mg-1In	4.6				Douglass, 1978	89
Mg	Mg-1Ni	4.6	102	300	1.1	Hong, 2002	1494		Rotation-cylinder synthesis method
Mg	Mg-1Pb	6.1				Douglass, 1978	89
Mg	Mg-1Si	4				Guinet, 1978	701
Mg	Mg1-xNix	2.3				Yang, 1999	1472	x=0-0.45	Ball milled
Mg	Mg-1Y	4.5				Douglass, 1978	89
Mg	Mg-1Zn	3				Douglass, 1978	89
Mg	Mg2.23Ni (M)	3.9	67.3	323	4.9	Friedlmeier, 1997	714
Mg	Mg2.42Ni (M)	3.9	63.1	301	3.2	Post, 1984	718
Mg	Mg-20TiO2	4.4				Wang, 2000	1486		H2-ball milled composite
Mg	Mg-21Al (M)	6.6		352	6	Reilly, 1976	490
Mg	Mg-23Ni (M)		78.2	300	2	Akiba, 1982	91
Mg	Mg-25Ni	5.7				Douglass, 1974	192
Mg	Mg-25Ni (M)	5.7	77.5	323	3	Reilly, 1968	88
Mg	Mg-26Cu (M)	5.3	78.3	330	3.2	Reilly, 1967	87
Mg	Mg2Al3	1.9		350	14	Nachman, 1982	700
Mg	Mg2Al3	2.3		326	10	Reilly, 1976	490	(Beta phase)
Mg	Mg2Al3	3.3				Reilly, 1974	491	(Beta phase)
Mg	Mg2Al3 (M)	2.6	63.2	335	11	Mintz, 1980	698
Mg	Mg2AlLi.28	3.8		352	15	Reilly, 1976	490
Mg	Mg2Ca	5.9				Verbetsky, 1984	1501
Mg	Mg2Ca	5.9				Semenenko, 1984	1502
Mg	Mg2Ca	1.4				Reilly, 1974	491
Mg	Mg2Ca	4.9				Semenenko, 1983	1499
Mg	Mg2Ce	3.6				Gingl, 1997	650
Mg	Mg2Co	4.5				Selvam, 1991	426	(Mg2Co phase not stable without H)
Mg	Mg2Co	4.5	76	450	16	Reiser, 2000	1463	Mg2Co not stable without H
Mg	Mg2Co (M)	4.2	108	418	5.7	Yoshida, 1993	594	(Mg2Co phase not stable without H)
Mg	Mg2Cu	2.6				Verbetsky, 1984	1501
Mg	Mg.56Al.34YM.05Mm.05	1.1		310	1.5	Nachman, 1982	700
Mg	Mg.56Al.34YM.1	2.9		310	1.9	Nachman, 1982	700	(YM=Yttrium Mischmetal)
Mg	Mg.59Al.36La.05	3		310	1.9	Nachman, 1982	700
Mg	Mg.59Al.36Li.05	1.8		310	0.7	Nachman, 1982	700
Mg	Mg.59Al.36Ni.05	3.4		310	1.8	Nachman, 1982	700
Mg	Mg.59Al.36Si.05	0.6		310	0.4	Nachman, 1982	700
Mg	Mg.59Al.36Sn.05	0.5		310	0.5	Nachman, 1982	700
Mg	Mg.59Al.36Y.05	2		310	2.2	Nachman, 1982	700
Mg	Mg.62Al.38	2.3		310	1.4	Nachman, 1982	700
Mg	Mg.675Li.2Si.125	1.6		310	0.4	Nachman, 1982	700
Mg	Mg.67Li.11Ni.11Sn.06Cu.06	1.7		310	2	Nachman, 1982	700
Mg	Mg.6Al.4	1		310	0.7	Nachman, 1982	700
Mg	Mg.725Li.1Ni.1Sn.025Zn.025Cu.025	1.4		310	1.8	Nachman, 1982	700
Mg	Mg.725Li.1Ni.1Sn.05Cu.025	1.5		310	2	Nachman, 1982	700
Mg	Mg.72Li.28	5.5		350	1.5	Huot, 1998	843
Mg	Mg.75Li.1Ni.05Sn.05Cu.05	1.3		310	1.5	Nachman, 1982	700
Mg	Mg.75Li.1Ni.1Cu.05	1.9		310	1.6	Nachman, 1982	700
Mg	Mg.75Li.1Ni.1Sn.05	1.9		310	1.8	Nachman, 1982	700
Mg	Mg.75Li.1Ni.1Zn.05	1				Nachman, 1982	700
Mg	Mg.75Zn.1Ni.05	3		299	1.4	Rohy, 1978	90
Mg	Mg.7Li.1Ni.1Cu.1	1.6		310	1	Nachman, 1982	700
Mg	Mg.7Li.1Ni.1Sn.05Zn.05	1.5		310	2	Nachman, 1982	700
Mg	Mg.7Li.1Ni.1Sn.1	2.3		310	2.4	Nachman, 1982	700
Mg	Mg.7Li.1Ni.1Zn.1	0.9				Nachman, 1982	700
Mg	Mg.7Li.2Cu.1	0.7		310	0.5	Nachman, 1982	700
Mg	Mg.7Li.2Sn.1	0.6		310	0.5	Nachman, 1982	700
Mg	Mg.7Li.2Zn.1	1.1		310	0.6	Nachman, 1982	700
Mg	Mg.8275Ni.05Cu.0775Zn.045	3.8		299	1.6	Rohy, 1978	90
Mg	Mg.833Ni.066Cu.095M1.006 (M)	4.9	68	357	25	Au, 1995	711	(M1=La-rich Mm)
Mg	Mg.845Ni.05Cu.1Y.005	2.9		299	1.5	Rohy, 1978	90
Mg	Mg.846Ni.05Cu.09Si.006M1.008	5.2				Au, 1995	711	(M1=La-rich Mm)
Mg	Mg.855Ni.044Cu.017Si.004Y.008	5.1				Au, 1995	711
Mg	Mg.85Cu.1Ni.05	3.1		299	1.6	Rohy, 1978	90
Mg	Mg.85Cu.1Ni.05Sn.02	2.3		299	1.6	Rohy, 1978	90
Mg	Mg.85Li.05Cu.1	0.5		310	0.4	Nachman, 1982	700
Mg	Mg.85Li.05Ni.1	1.4		310	1	Nachman, 1982	700
Mg	Mg.85Li.05Sn.1	0.8		310	0.5	Nachman, 1982	700
Mg	Mg.85Li.05Zn.1	0.6		310	0.3	Nachman, 1982	700
Mg	Mg.8Al.1Cu.1	1.5		310	1.6	Nachman, 1982	700
Mg	Mg.8Al.1La.1	4.2		310	2.1	Nachman, 1982	700
Mg	Mg.8Al.1Y.1	4.1		310	1.6	Nachman, 1982	700
Mg	Mg.8Li.05Ni.1Cu.05	1.1		310	0.9	Nachman, 1982	700
Mg	Mg.8Li.05Ni.1Sn.05	2.5		310	2	Nachman, 1982	700
Mg	Mg.8Li.05Ni.1Zn.05	1.6		310	1.8	Nachman, 1982	700
Mg	Mg.8Li.1Cu.1	0.9		310	0.6	Nachman, 1982	700
Mg	Mg.8Li.1Ni.1	2		310	1.2	Nachman, 1982	700
Mg	Mg.8Li.1Si.1	1.3		310	0.8	Nachman, 1982	700
Mg	Mg.8Li.1Sn.1	1.7		310	0.8	Nachman, 1982	700
Mg	Mg.8Li.1Zn.1	1.6		310	0.6	Nachman, 1982	700
Mg	Mg.9Sc.1	6.2	79.5	375	8	Ogawa, 1982	705
Mg	Mg0.0671Ca0.270Cu0.059	5				Verbetsky, 1984	1501
Mg	Mg0.58Al0.42	2.5		350	10	Bouaricha, 2000	1482		Ball milled
Mg	Mg0.5Al0.5	3.4		280	3	Zaluska, 2001	1434		Nanocrystalline
Mg	Mg0.63Ni0.12Y0.01	1.9				Spassov, 1999	1471	Amorphous
Mg	Mg0.63Ni0.3Y0.07	2.8				Spassov, 1999	1471	Amorphous
Mg	Mg0.673Ca0.071Cu0.256	3.3				Verbetsky, 1984	1501
Mg	Mg0.673Ca0.176Cu0.051	4.4				Verbetsky, 1984	1501
Mg	Mg0.708La0.125Al0.167	4.2	67	300	4.5	Semenenko, 1986	1507			Sloping plateau
Mg	Mg0.70Ni0.25Nd0.05	3.4	69	300	3	Tanaka, 1999	1479		Melt spun
Mg	Mg0.747Ca0.270Ce0.013	5.7				Semenenko, 1984	1502
Mg	Mg0.75Al0.25	3.5		350	6	Bouaricha, 2000	1482		Ball milled
Mg	Mg0.75Ni0.2MM0.05	4				Spassov, 1999	1471	Amorphous
Mg	Mg0.797Ca0.166Ce0.037	4.6				Semenenko, 1984	1502
Mg	Mg0.80La0.10Al0.10	4.8	76	302	5.5	Semenenko, 1986	1507			Sloping plateau
Mg	Mg0.80Ni0.15Nd0.05	4.9	76	300	1.6	Tanaka, 1999	1479		Melt spun
Mg	Mg0.85La0.10Al0.05	6.2	77	300	4.5	Semenenko, 1986	1507			Sloping plateau
Mg	Mg0.875Ca0.060Cu0.065	5.4				Verbetsky, 1984	1501
Mg	Mg0.878Ca0.020Cu0.102	5				Verbetsky, 1984	1501
Mg	Mg0.87Ni0.13 (M)	5.7		325	3	Friedlmeier, 1999	1475		Melt spun
Mg	Mg0.880Ca0.056Ce0.064	4.4				Semenenko, 1984	1502
Mg	Mg0.90Ca0.14Cu0.06	4.5				Verbetsky, 1984	1501
Mg	Mg0.90La0.075Al0.025	5.1	68	308	5	Semenenko, 1986	1507			Sloping plateau
Mg	Mg0.917Ca0.063Ce0.020	5.7				Semenenko, 1984	1502
Mg	Mg0.931Ca0.012Cu0.057	5.2				Verbetsky, 1984	1501
Mg	Mg0.949Ca0.017Ce0.034	5.4				Semenenko, 1984	1502
Mg	Mg0.950Ca0.031Ce0.019	5.5				Semenenko, 1984	1502
Mg	Mg0.968Ca0.013Ce0.019	4.9				Semenenko, 1984	1502
Mg	Mg0.975Ca0.004Cu0.021	5.1				Verbetsky, 1984	1501
Mg	Mg-1 at% Al2O3	5.8				Oelerich, 2001	1487		Ball milled
Mg	Mg-1 at% Sc2O3	6				Oelerich, 2001	1487		Ball milled
Mg	Mg-1 at% SiO2	5.5				Oelerich, 2001	1487		Ball milled
Mg	Mg-1 at% TiO2	6				Oelerich, 2001	1487		Ball milled
Mg	Mg-1 at% V	6.1				Oelerich, 2001	1488		Ball milled
Mg	Mg-1 at% V2O5	6.2				Oelerich, 2001	1487		Ball milled
Mg	Mg1.5Ni	2.6	29.1	300	3.7	Kuji, 2002	1492		Ball milled
Mg	Mg-1.5Zr	6.3				Zaluska, 2001	1434		Nanocrystalline
Mg	Mg1.75Ni	2.8	26.6	300	4.5	Kuji, 2002	1492		Ball milled
Mg	Mg2Cu	2.6				Guinet, 1978	701
Mg	Mg2Cu	2.6	72.9	295	6	Reilly, 1967	87
Mg	Mg2CuAl.125 (M)	2.8	63	330	11	Biris, 1982	716
Mg	Mg2CuAl.25 (M)	3	72	330	3	Biris, 1982	716
Mg	Mg2CuAl.375 (M)	3.2	76	330	3	Biris, 1982	716
Mg	Mg2Fe	5.5				Selvam, 1991	426	(Mg2Fe phase not stable without H)
Mg	Mg2Fe	5.5	79.2	450	28	Reiser, 1998	1159	(Mg2Fe phase not stable without H)
Mg	Mg2Fe	5.5	77.2	450	25	Reiser, 2000	1463	Mg2Fe not stable without H
Mg	Mg2La	3.6				Gingl, 1997	650
Mg	Mg2Mm	2.1				Reilly, 1974	491
Mg	Mg2Ni	3.1		300	1	Dehouche, 1998	854	Nanocrystalline
Mg	Mg2Ni	3.1	31.3	300	3.7	Kuji, 2002	1492		Ball milled
Mg	Mg2Ni	3.2	61	250	1.1	Yang, 2002	1493		Ball milling + diffusion synthesis
Mg	Mg2Ni	3.3	67	300	2.2	Liang, 1999	1226	Nanocrystalline
Mg	Mg2Ni	3.3	65.9	300	3.2	Sun, 1999	1228	Solid-state synthesized
Mg	Mg2Ni	3.3	63.2	300	3.1	Song, 1998	1224
Mg	Mg2Ni	3.5	64.4	180	0.07	Guthrie, 1998	863	Vapor synthesized
Mg	Mg2Ni	3.5	64.4	180	0.09	Guthrie, 1998	863	Vapor synthesized
Mg	Mg2Ni	3.5	68.6	180	0.05	Guthrie, 1998	863	Melted
Mg	Mg2Ni			250	1.1	Tsushio, 1998	830
Mg	Mg2Ni	3.6	64.5	299	3.2	Reilly, 1968	88
Mg	Mg2Ni	3.6	64.6	300	2.5	Lutz, 1977	420	(Dynamic PCT)
Mg	Mg2Ni	3.6				Ivanov, 1987	708	(Mechanical alloy)
Mg	Mg2Ni	3.6	68.8	180	0.06	Guthrie, 1998	863	Melted
Mg	Mg2Ni	3.6	71.3	300	2.6	Li, 2000	1236	Hydriding combustion synthesis
Mg	Mg2Ni	3.7	62.2	450	57	Reiser, 2000	1463
Mg	Mg2Ni	4.4				Chen, 2002	1491		P=60,000 atm (LiAlH4 H2 source)
Mg	Mg2Ni	5.2				Chen, 2000	1234
Mg	Mg-2Ni	7.2	75.6	316	2.7	Friedlmeier, 1997	714
Mg	Mg2Ni.63Fe.37 (M)	3.7	82	320	1.7	Lupu, 1983	717
Mg	Mg2Ni.75Al.25 (M)	3.5	90	327	2	Biris, 1982	758
Mg	Mg2Ni.75Co.25	3.1	68	297	1	Selvam, 1988	712	(Cal)
Mg	Mg2Ni.75Co.25	3.1	64.5	279	1	Darnaudery, 1983	418
Mg	Mg2Ni.75Co25	3.4		300	1	Yang, 2000	1233
Mg	Mg2Ni.75Cr.25	3	59.9	248	1	Darnaudery, 1983	418
Mg	Mg2Ni.75Cu.25		53.2	227	1	Darnaudery, 1983	418
Mg	Mg2Ni.75Fe.25	2.8	63.2	253	1	Darnaudery, 1983	418
Mg	Mg2Ni.75Fe.25	2.9	66	285	1	Selvam, 1988	712
Mg	Mg2Ni.75Fe.25 (M)	3.3	65.2	300	1.9	Yuan, 1997	828
Mg	Mg2Ni.75Fe.25 (M)	3.6	86	312	2	Lupu, 1983	717
Mg	Mg2Ni.75V.25	2.9	62.4	250	1	Darnaudery, 1983	418
Mg	Mg2Ni.75Zn.25	3.1	66	283	1	Selvam, 1988	712
Mg	Mg2Ni.75Zn.25	3.3	61.5	246	1	Darnaudery, 1983	418
Mg	Mg2Ni.85Al.15 (M)	3.4	84	327	3	Biris, 1982	758
Mg	Mg2Ni-0.2 at% Mn2O3	3.1				Oelerich, 2001	1487		Ball milled
Mg	Mg2Ni0.75Co0.25	3.2	61	250	0.5	Yang, 2002	1493		Ball milling + diffusion synthesis	Sloping plateau
Mg	Mg2Ni0.75Cr0.25	3.2	61	250	0.9	Yang, 2002	1493		Ball milling + diffusion synthesis
Mg	Mg2Ni0.75Cu0.25	3.2	59	250	1.2	Yang, 2002	1493		Ball milling + diffusion synthesis
Mg	Mg2Ni0.75Fe0.25	3.2	60	250	1	Yang, 2002	1493		Ball milling + diffusion synthesis
Mg	Mg2Ni0.75Mn0.25	3.2	58	250	1	Yang, 2002	1493		Ball milling + diffusion synthesis
Mg	Mg2Ni0.75Ti0.25	3.2	56	250	1.2	Yang, 2002	1493		Ball milling + diffusion synthesis
Mg	Mg2Ni0.75Ti0.25	3.2	59	250	1.3	Yang, 2002	1493		Ball milling + diffusion synthesis
Mg	Mg2Ni0.7Zr0.3	3.5	59.8	340	10	Zhang, 1998	1465
Mg	Mg2Ni1-xZrx	3.2	59.8 - 64	248	1	Zhang, 1998	1465	x=0 to 0.3
Mg	Mg2Ni1-yBey	3.9	71 - 80	337	2017-03-06	Lupu, 1982	419	(y = 0.15-0.25)
Mg	Mg2Ni1-yCuy	2.5	62 - 66	252	1	Selvam, 1988	712	(y=0-1)
Mg	Mg2Ni1-yCuy	2.6	53 - 73	300	3.5 - 8	Darnaudery, 1983	417	(y = 0-1)
[truncated: 723 more rows]
